# Supplementary material for: Synthesis, spectroscopic investigation, and DFT study of N,N′-disubstituted ferrocene-based thiourea complexes as potent anticancer agents
Source: Royal Society of Chemistry journal article supplement (doi:10.1039/c7dt04090c), 2017-12-22
Supplement: c7dt04090c2.pdf [file c7dt04090c2.pdf]

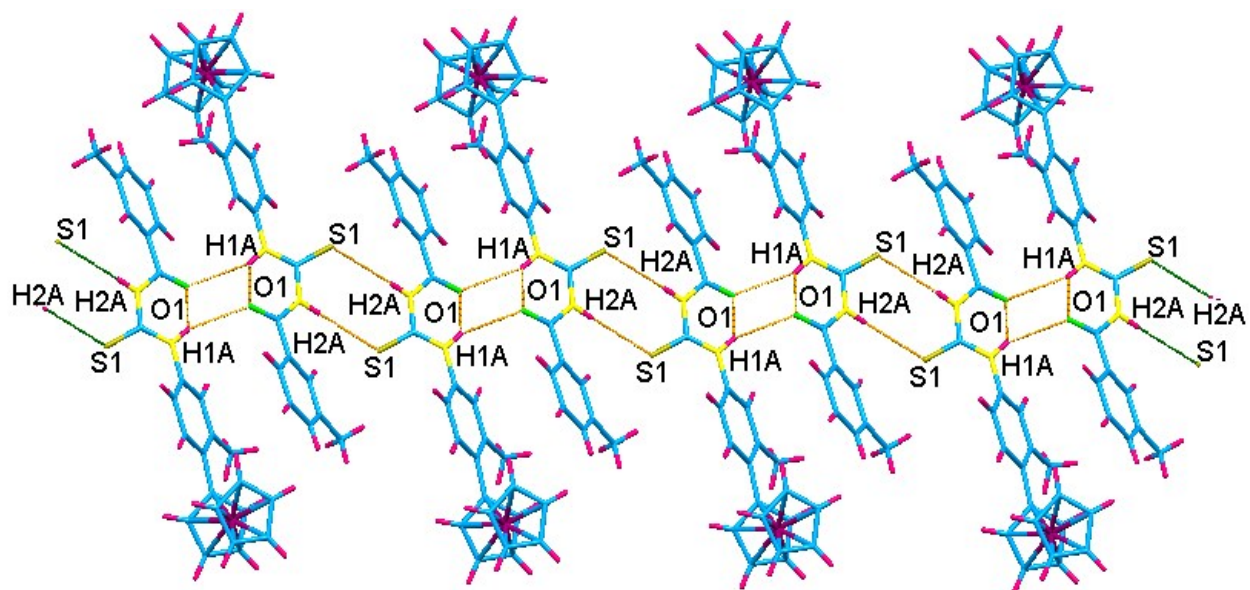

**Figure S1.** Secondary non-covalent interactions in A8 leading to supramolecular structure.

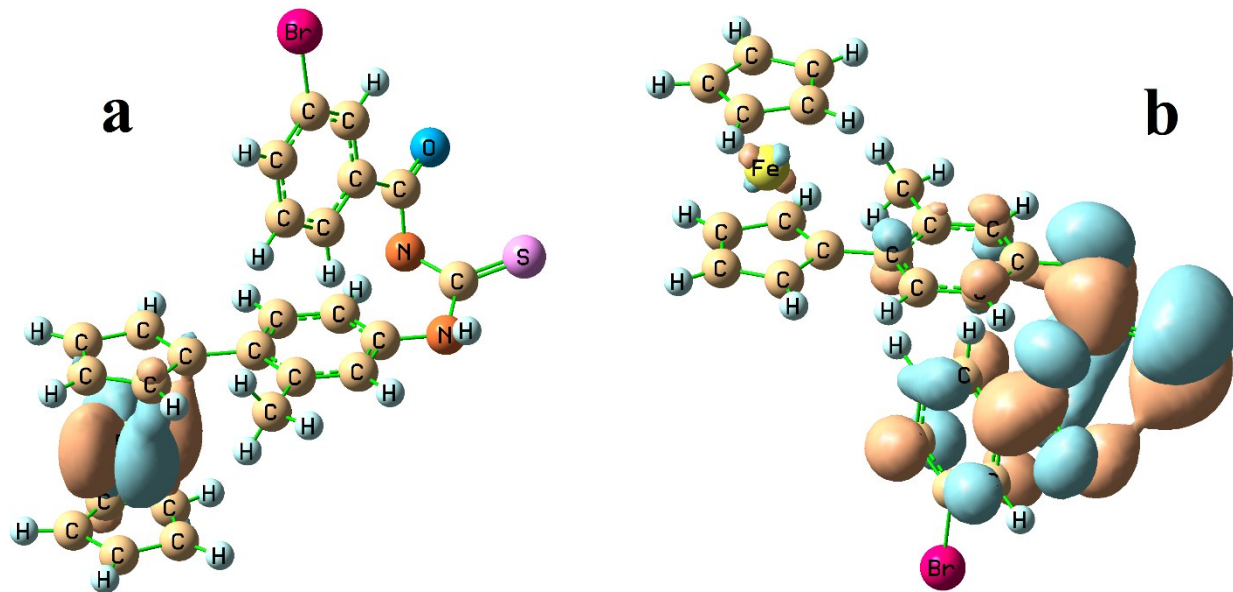

**Figure S2.** (a) Representative graphical demonstration of HOMO of A5. (b) Representative graphical demonstration of LUMO orbitals of A5.

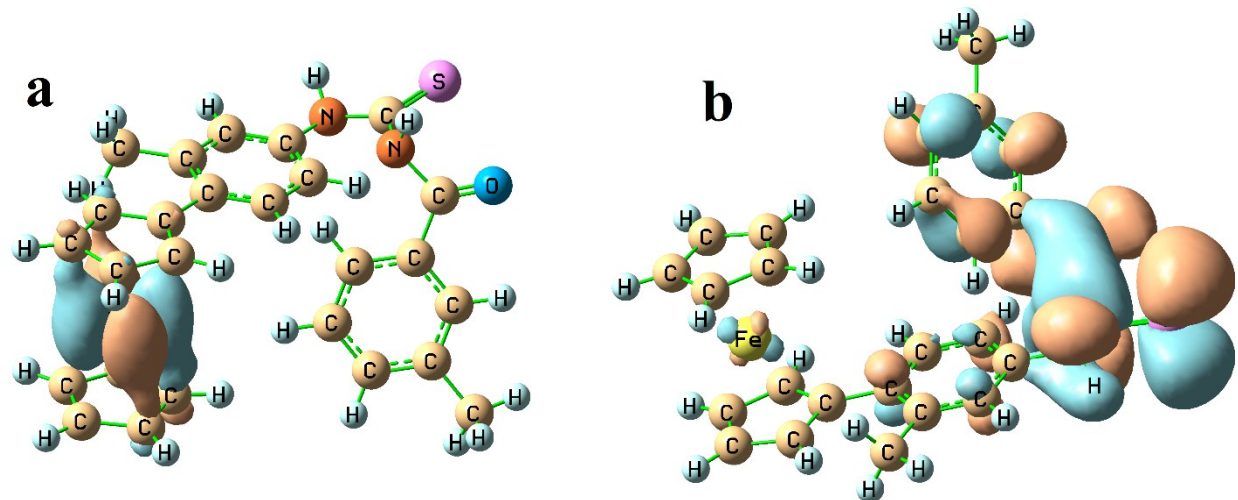

**Figure S3.** (a) Representative graphical demonstration of HOMO of **A8**. (b) Representative graphical demonstration of LUMO orbitals of **A8**.

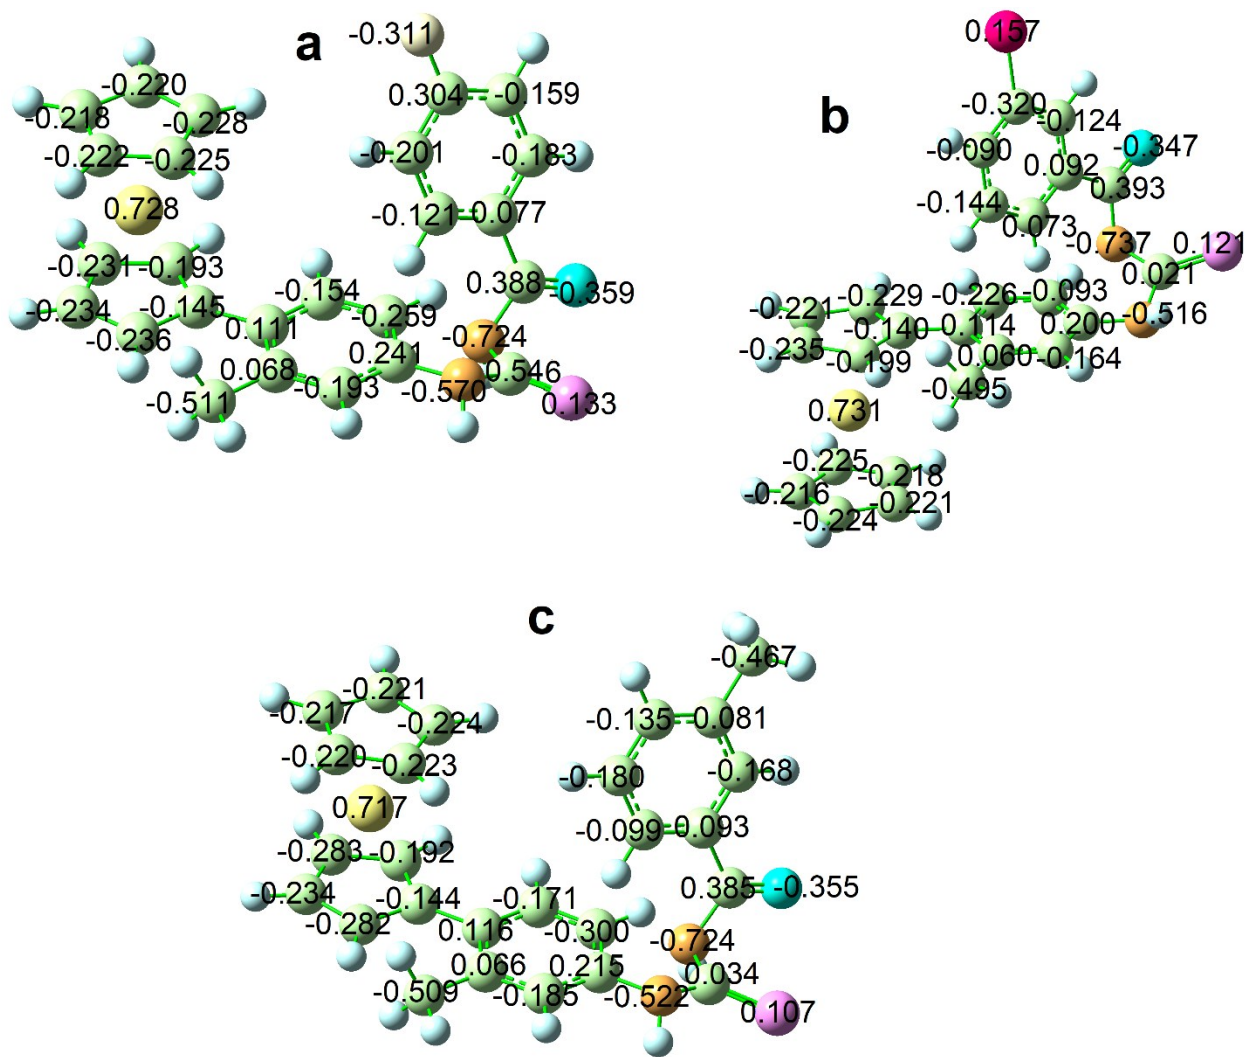

**Figure S4.** Graphical representation of charge distribution on the molecular structures (a) **A3**, (b) **A5**, and (c) **A8**.

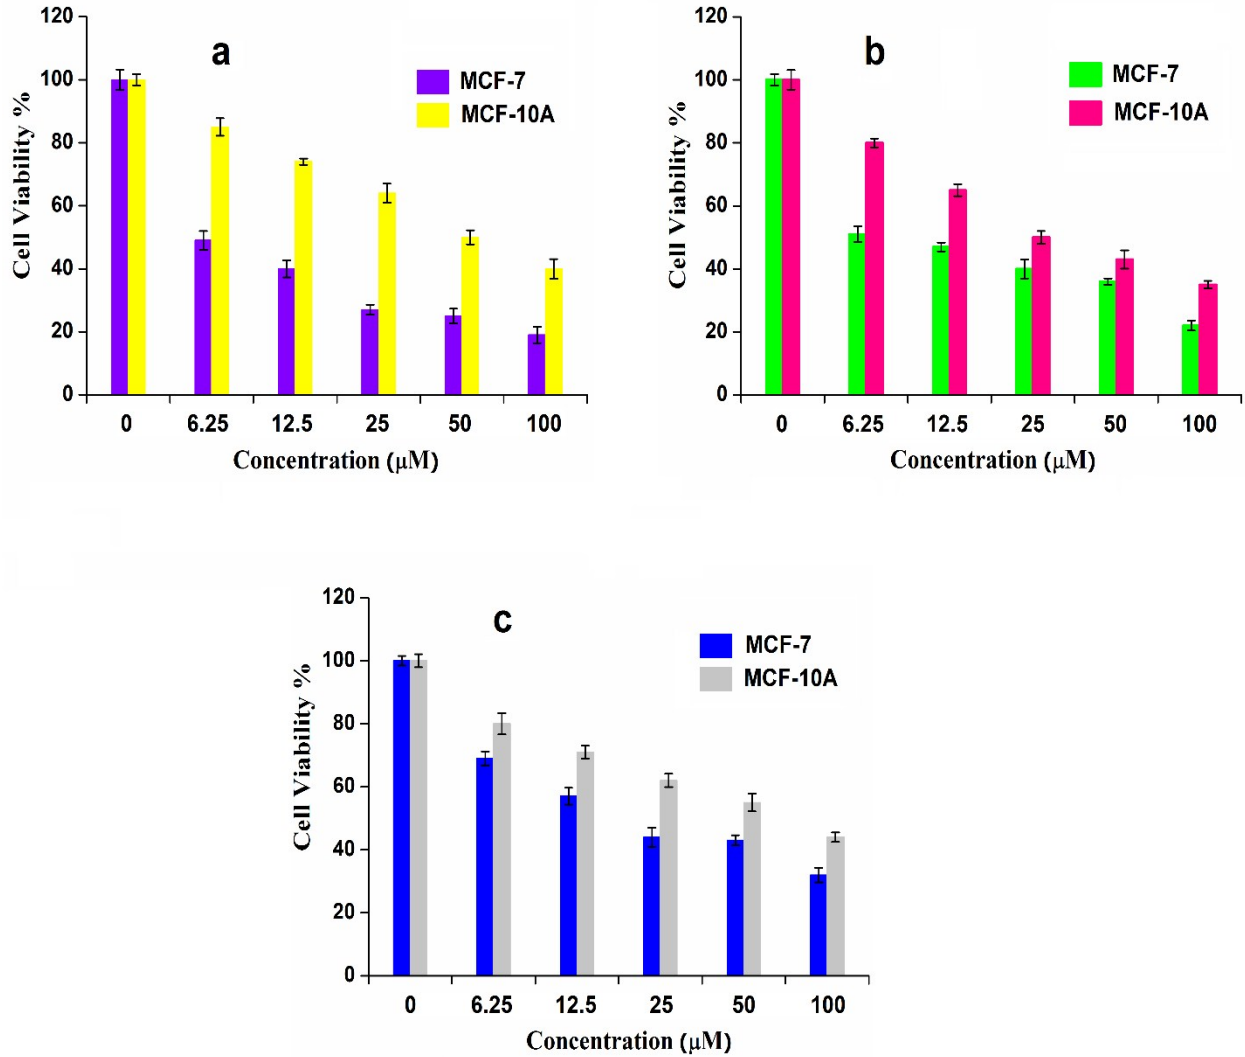

**Figure S5.** Cell viability (%) of cancerous and non-cancerous cells at various concentrations of (a) **A3**, (b) **A5**, and (c) **A8**, after 72 h of incubation.

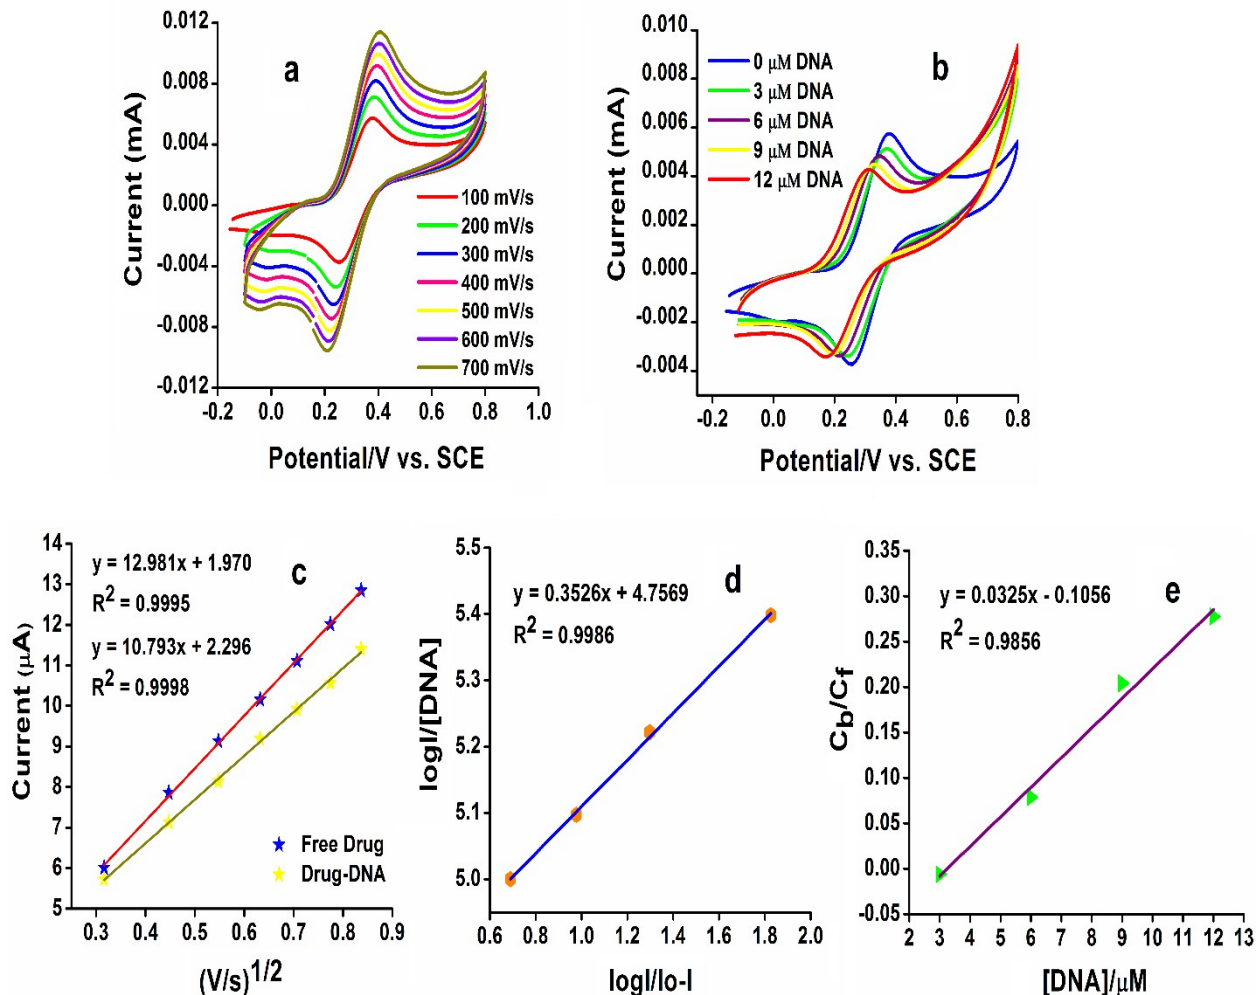

**Figure S6.** (a) Representative plots of Current vs. Potential/V (SCE) at different scan rates for **A8**. (b) Cyclic voltammogram of 1 mM **A8** with 1 mL of 0.5 M TBAP as supporting electrolyte in the absence and presence of 3-12  $\mu M$  DNA showing a decrease in  $I$  from  $I_0$  and a concentration dependent -ve shift in potential showing electrostatic interactions. (c) Representative plot of current vs.  $(V/s)^{1/2}$ , for the determination of diffusion coefficient of free **A8** and **A8**-3  $\mu M$  DNA. (d) Representative plot of  $\log(I/I_0 - I)$  vs.  $\log(1/[DNA])$  for determination of binding constant of **A8**. (e) Plot of  $C_b/C_f$  vs.  $[DNA]/\mu M$  for determination of binding site size of 3-12  $\mu M$  DNA concentrations **A8**.

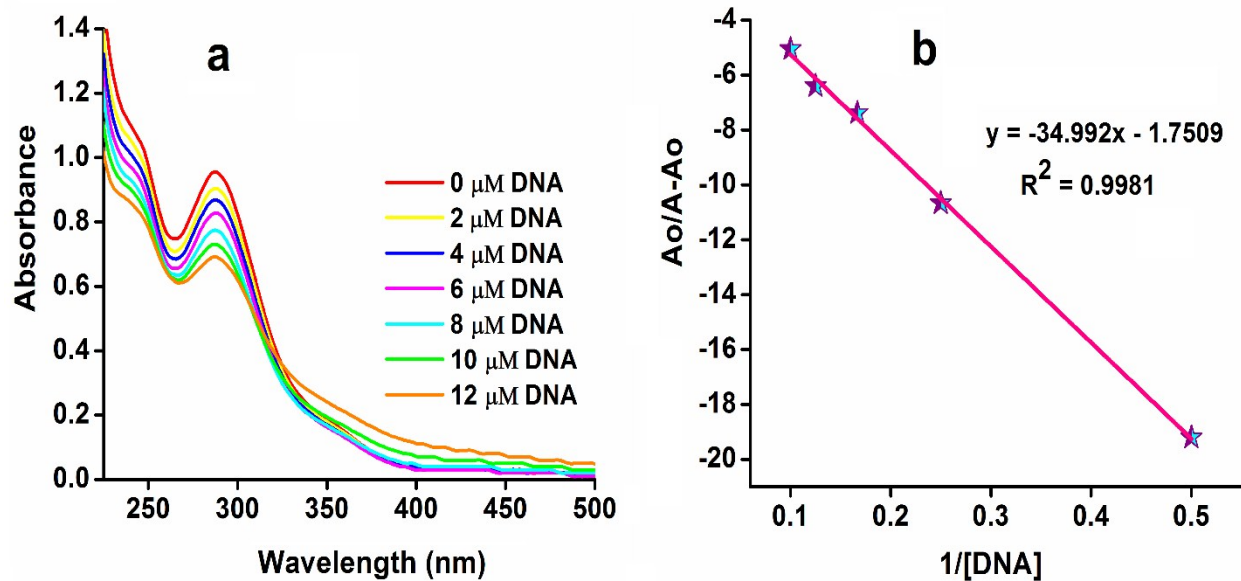

**Figure S7.** (a) Representative plots of absorbance vs. wavelength of 25  $\mu\text{M}$  **A8** in ethanol with increasing concentration of DNA (2-12  $\mu\text{M}$ ). (b) Plot of  $A_0/A - A_0$  vs.  $1/[DNA]$  for determination of DNA binding constant of **A8**.

**Table S1.** Selected bond lengths [ $\text{\AA}$ ] and angles [ $^\circ$ ] for **A8**.

| <b>Bond Lengths (<math>\text{\AA}</math>)</b> |           |
|-----------------------------------------------|-----------|
| C(1)-C(2)                                     | 1.408(3)  |
| C(6)-C(7)                                     | 1.415(3)  |
| Fe(1)-C(5)                                    | 2.042(2)  |
| Fe(1)-C(10)                                   | 2.056(17) |
| C(10)-C(11)                                   | 1.479(2)  |
| C(11)-C(12)                                   | 1.392(2)  |
| C(11)-C(16)                                   | 1.399(2)  |
| N(1)-C(14)                                    | 1.423(2)  |
| N(1)-C(18)                                    | 1.324(2)  |
| S(1)-C(18)                                    | 1.659(18) |
| N(2)-C(18)                                    | 1.392(2)  |
| N(2)-C(19)                                    | 1.377(2)  |
| O(1)-C(19)                                    | 1.217(2)  |
| C(19)-C(20)                                   | 1.486(2)  |
| C(22)-C(26)                                   | 1.502(3)  |

  

| <b>Bond Angles (<math>^\circ</math>)</b> |            |
|------------------------------------------|------------|
| C(1)-C(2)-Fe(1)                          | 40.47(9)   |
| C(6)-C(7)-Fe(1)                          | 40.82(8)   |
| C(9)-C(10)-C(11)                         | 127.6(17)  |
| C(10)-C(11)-C(12)                        | 119.8(15)  |
| C(11)-C(16)-C(17)                        | 123.2(15)  |
| C(15)-C(16)-C(17)                        | 118.2(15)  |
| N(1)-C(14)-C(15)                         | 116.6(15)  |
| C(14)-N(1)-C(18)                         | 127.9(15)  |
| N(1)-C(18)-S(1)                          | 126.4(13)  |
| N(2)-C(18)-S(1)                          | 118.2(12)  |
| N(1)-C(18)-N(2)                          | 115.4(15)  |
| C(18)-N(2)-C(19)                         | 128.2(14)  |
| N(2)-C(19)-O(1)                          | 122.7(16)  |
| N(2)-C(19)-C(20)                         | 115.9(15)  |
| C(19)-C(20)-C(25)                        | 117.1((16) |
| C(21)-C(22)-C(26)                        | 120.9(19)  |



**Table S2.** The intramolecular and intermolecular hydrogen bond interactions in **A8**.

| <b>H-Bonding</b>      | D  | H   | A  | d(D-H)/Å | d(H-A)/Å | d(D-A)/Å  | D-H-A/° |
|-----------------------|----|-----|----|----------|----------|-----------|---------|
| <b>Intramolecular</b> | N1 | H1A | O1 | 0.86     | 1.98     | 2.646(2)  | 133.6   |
| <b>Intermolecular</b> | N1 | H1A | O1 | 0.86     | 2.54     | 3.254(2)  | 141.4   |
| <b>Intermolecular</b> | N2 | H2A | S1 | 0.86     | 2.90     | 3.759(15) | 175.5   |

# <sup>1</sup>H-NMR Spectrum of A1

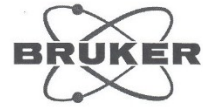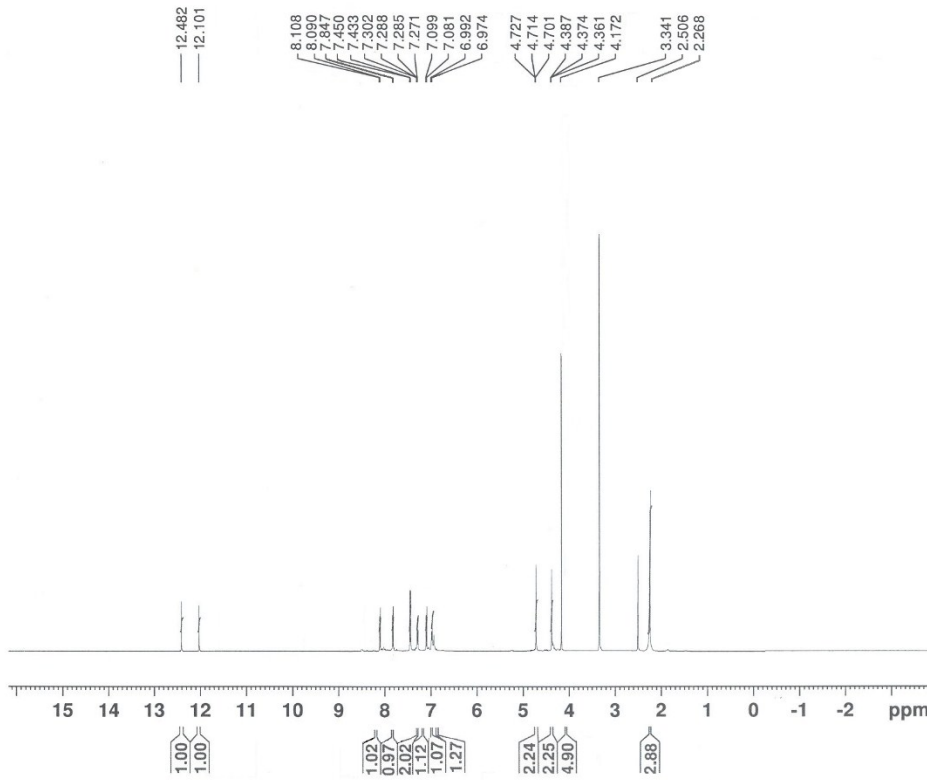

Current Data Parameters  
NAME A1  
EXPNO 1  
PROCNO 1

F2 - Acquisition Parameters  
Date\_ 20171209  
Time 14.01  
INSTRUM AVIII500HD  
PROBHD 5 mm PABBO BB/  
PULPROG zg30  
TD 65536  
SOLVENT DMSO  
NS 32  
DS 2  
SWH 10000.000 Hz  
FIDRES 0.152588 Hz  
AQ 3.2767999 sec  
RG 106.56  
DW 50.000 usec  
DE 13.50 usec  
TE 297.0 K  
D1 1.00000000 sec  
TD0 1

===== CHANNEL f1 =====  
SFO1 500.3030896 MHz  
NUC1 <sup>1</sup>H  
P1 10.00 usec  
PLW1 21.89999962 W

F2 - Processing parameters  
SI 65536  
SF 500.3000000 MHz  
WDW EM  
SSB 0  
LB 0.30 Hz  
GB 0  
PC 1.00

# <sup>1</sup>H-NMR Spectrum of A1

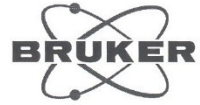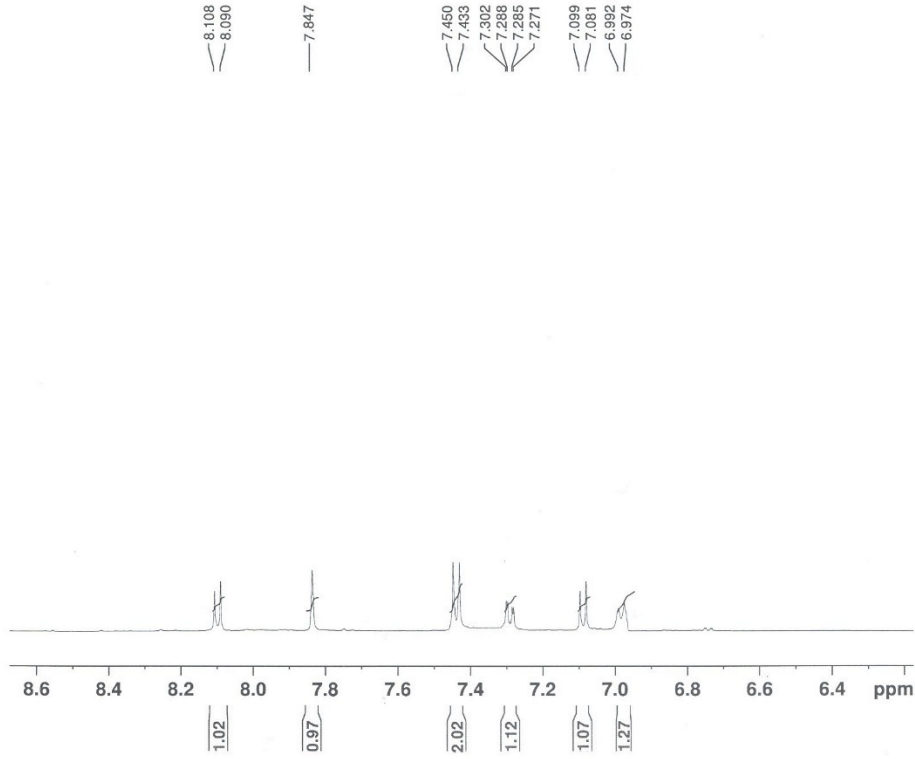

Current Data Parameters  
NAME A1  
EXPNO 1  
PROCNO 1

F2 - Acquisition Parameters  
Date\_ 20171209  
Time 14.01  
INSTRUM AVII500HD  
PROBHD 5 mm PABBO BB/  
PULPROG zg30  
TD 65536  
SOLVENT DMSO  
NS 32  
DS 2  
SWH 10000.000 Hz  
FIDRES 0.152588 Hz  
AQ 3.2767999 sec  
RG 106.56  
DW 50.000 usec  
DE 13.50 usec  
TE 297.0 K  
D1 1.00000000 sec  
TD0 1

----- CHANNEL f1 -----  
SFO1 500.3030896 MHz  
NUC1 1H  
P1 10.00 usec  
PLW1 21.89999962 W

F2 - Processing parameters  
SI 65536  
SF 500.3000000 MHz  
WDW EM  
SSB 0  
LB 0.30 Hz  
GB 0  
PC 1.00

# <sup>13</sup>C-NMR Spectrum of A1

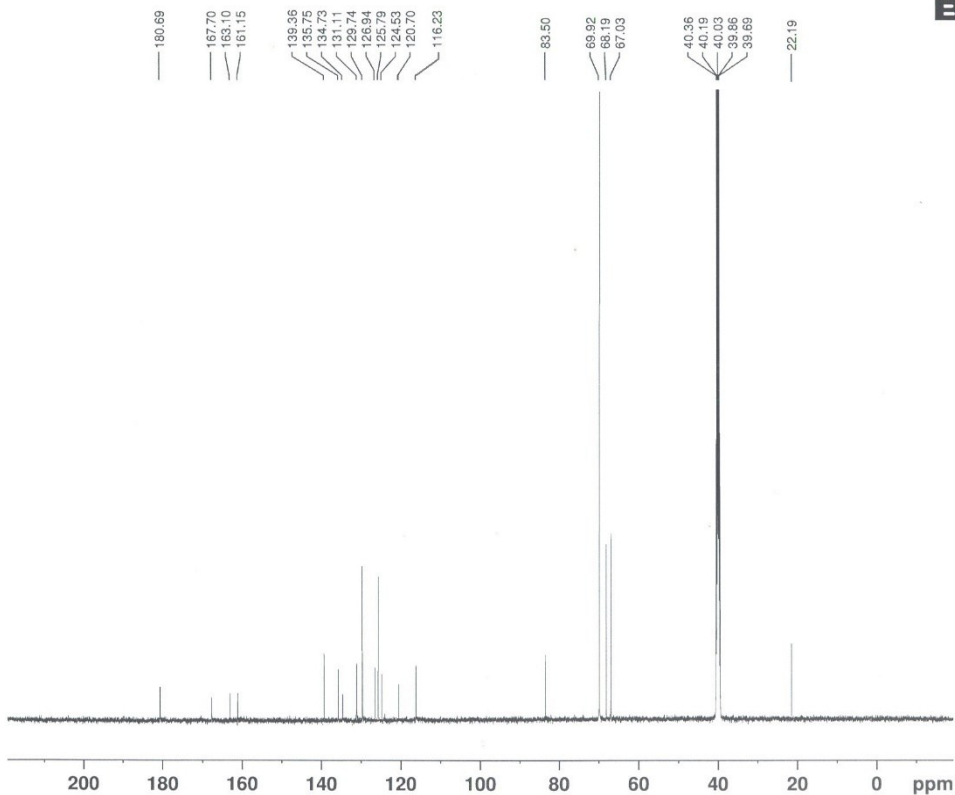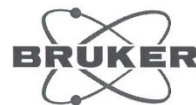

Current Data Parameters  
NAME A1  
EXPNO 3  
PROCNO 1

F2 - Acquisition Parameters  
Date\_ 20140712  
Time 4.39  
INSTRUM AVIII500HD  
PROBHD 5 mm PABBO BB/  
PULPROG zgpg30  
TD 65536  
SOLVENT DMSO  
NS 4  
DS 1700  
SWH 30000.000 Hz  
FIDRES 0.457764 Hz  
AQ 1.0922667 sec  
RG 192.72  
DW 16.667 usec  
DE 7.48 usec  
TE 301.0 K  
D1 2.0000000 sec  
D11 0.0300000 sec  
TD0 1

===== CHANNEL f1 =====  
SFO1 125.8131140 MHz  
NUC1 <sup>13</sup>C  
P1 10.00 usec  
PLW1 78.00000000 W

===== CHANNEL f2 =====  
SFO2 500.3020012 MHz  
NUC2 <sup>1</sup>H  
CPDPRG2 waltz16  
PCPD2 80.00 usec  
PLW2 21.00000000 W  
PLW12 0.32813001 W  
PLW13 0.20999999 W

F2 - Processing parameters  
SI 32768  
SF 125.8065351 MHz  
WDW EM  
SSB 0  
LB 1.00 Hz  
GB 0  
PC 1.40

# <sup>1</sup>H-NMR Spectrum of A2

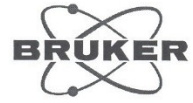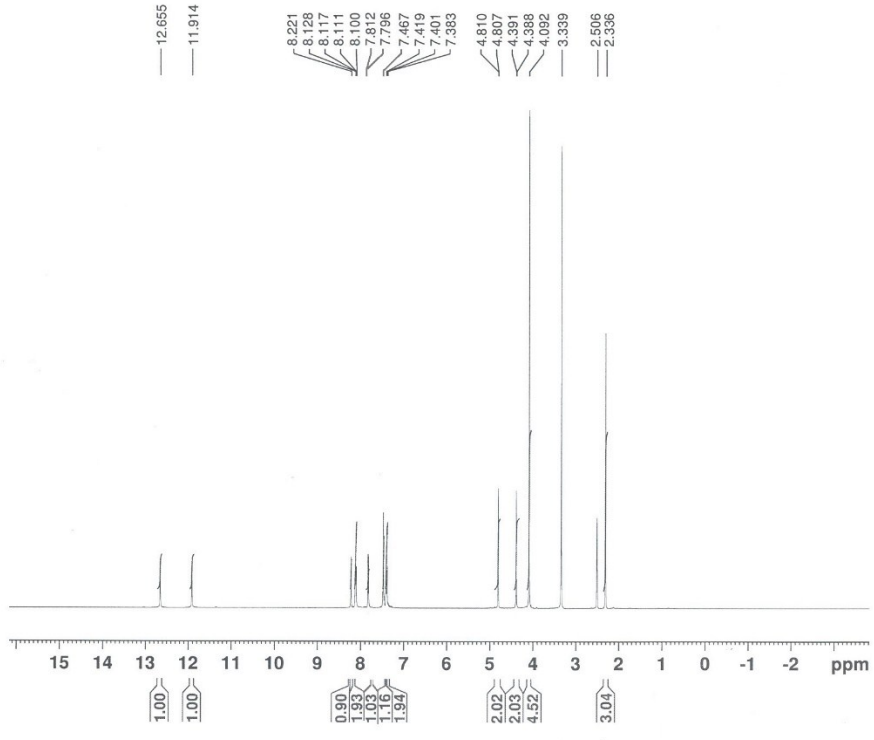

Current Data Parameters  
NAME A2  
EXPNO 2  
PROCNO 1

F2 - Acquisition Parameters  
Date\_ 20171209  
Time 18:07  
INSTRUM AVIII500HD  
PROBHD 5 mm PABBO BB/  
PULPROG zg30  
TD 65536  
SOLVENT DMSO  
NS 64  
DS 2  
SWH 10000.000 Hz  
FIDRES 0.152588 Hz  
AQ 3.2767999 sec  
RG 106.56  
DW 50.000 usec  
DE 13.50 usec  
TE 296.9 K  
D1 1.0000000 sec  
TDO 1

===== CHANNEL f1 =====  
SFO1 500.3030896 MHz  
NUC1 1H  
P1 10.00 usec  
PLW1 21.89999962 W

F2 - Processing parameters  
SI 65536  
SF 500.3000000 MHz  
WDW EM  
SSB 0  
LB 0.30 Hz  
GB 0  
PC 1.00

# <sup>1</sup>H-NMR Spectrum of A2

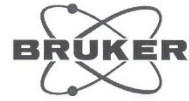

Current Data Parameters  
NAME A2  
EXPNO 2  
PROCNO 1

F2 - Acquisition Parameters  
Date\_ 20171209  
Time 18.07  
INSTRUM AVIII500HD  
PROBHD 5 mm PABBO BB/  
PULPROG zg30  
TD 65536  
SOLVENT DMSO  
NS 64  
DS 2  
SWH 10000.000 Hz  
FIDRES 0.152588 Hz  
AQ 3.2767999 sec  
RG 106.56  
DW 50.000 usec  
DE 13.50 usec  
TE 296.9 K  
D1 1.0000000 sec  
TDO 1

===== CHANNEL f1 =====  
SFO1 500.3030896 MHz  
NUC1 1H  
P1 10.00 usec  
PLW1 21.89999962 W

F2 - Processing parameters  
SI 65536  
SF 500.3000000 MHz  
WDW EM  
SSB 0  
LB 0.30 Hz  
GB 0  
PC 1.00

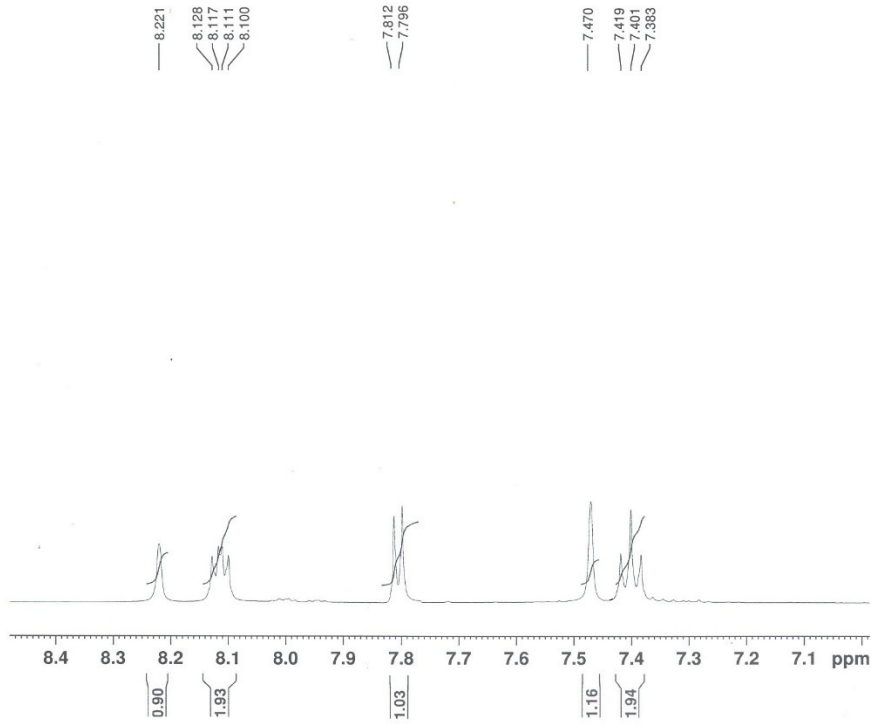

# <sup>13</sup>C-NMR Spectrum of A2

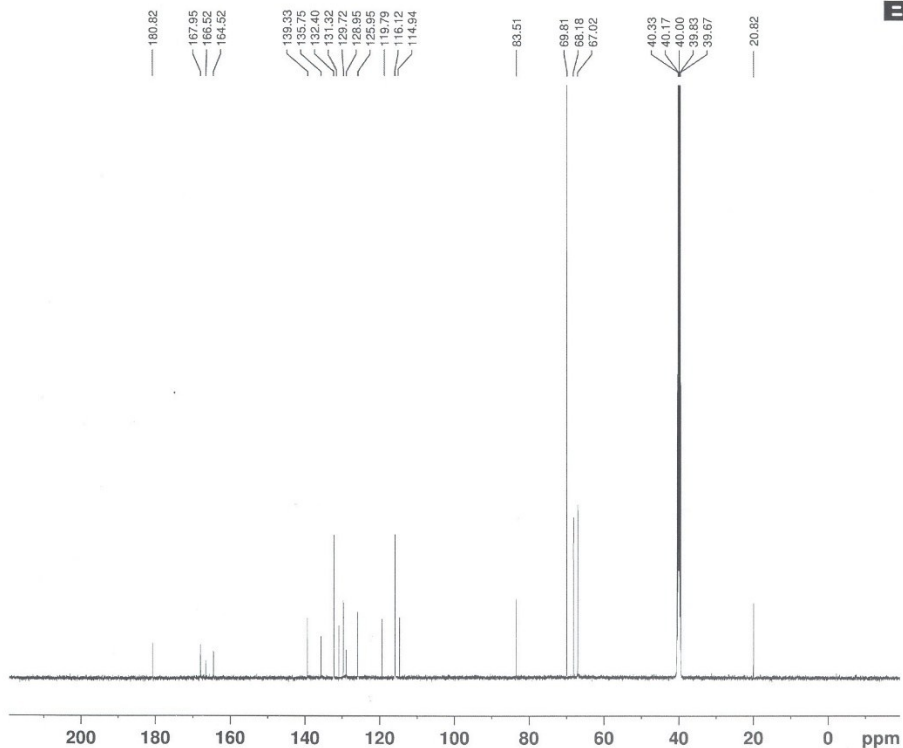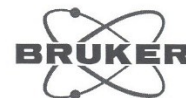

Current Data Parameters  
NAME A2  
EXPNO 3  
PROCNO 1

F2 - Acquisition Parameters  
Date\_ 20140712  
Time 0.15  
INSTRUM AVIIE00HD  
PROBHD 5 mm PABBO BB/  
PULPROG zgpg30  
TD 65536  
SOLVENT DMSO  
NS 1700  
DS 4  
SWH 30000.000 Hz  
FIDRES 0.457764 Hz  
AQ 1.0922667 sec  
RG 192.72  
DW 18.697 usec  
DE 7.48 usec  
TE 297.6 K  
D1 2.0000000 sec  
D11 0.0300000 sec  
TD0 1

===== CHANNEL 1 =====  
SFO1 125.8131140 MHz  
NUC1 13C  
P1 10.00 usec  
PLW1 78.00000000 W

===== CHANNEL 2 =====  
SFO2 500.3020012 MHz  
NUC2 1H  
CPDPRG2 waltz16  
PCPD2 80.00 usec  
PLW2 21.00000000 W  
PLW12 0.32813001 W  
PLW13 0.20999999 W

F2 - Processing parameters  
SI 32768  
SF 125.800351 MHz  
WDW EM  
SSB 0  
LB 1.00 Hz  
GB 0  
PC 1.40

# <sup>1</sup>H-NMR Spectrum of A3

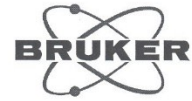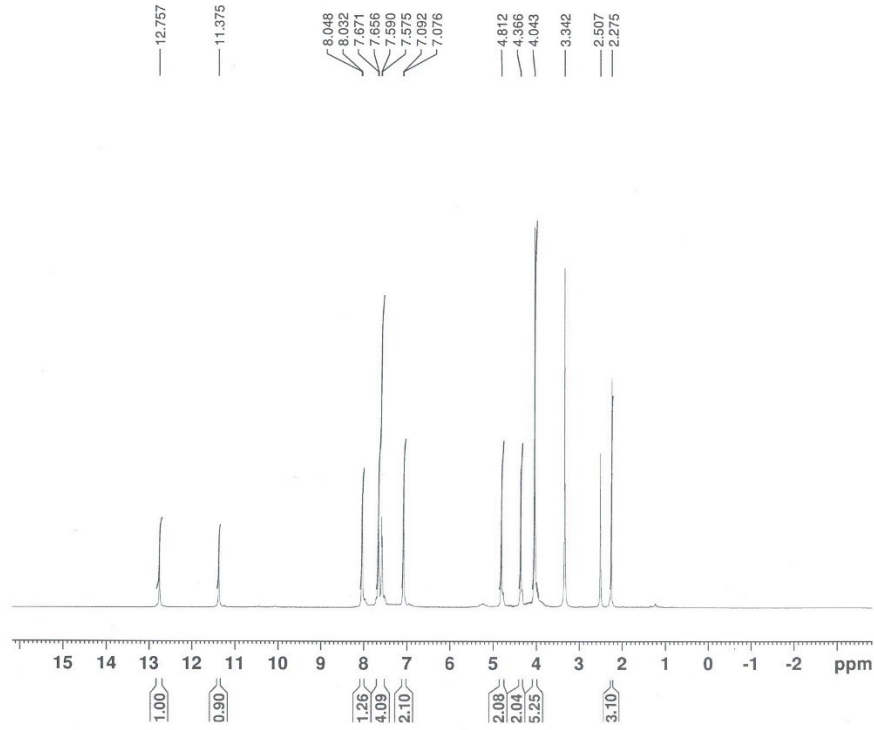

Current Data Parameters  
NAME A3  
EXPNO 1  
PROCNO 1

F2 - Acquisition Parameters  
Date\_ 20171208  
Time 13.22  
INSTRUM AVIIIS00HD  
PROBHD 5 mm PABBO BB/  
PULPROG zg30  
TD 65536  
SOLVENT DMSO  
NS 150  
DS 2  
SWH 10000.000 Hz  
FIDRES 0.152588 Hz  
AQ 3.2767999 sec  
RG 106.56  
DW 50.000 usec  
DE 13.50 usec  
TE 297.0 K  
D1 1.00000000 sec  
TDO 1

===== CHANNEL f1 =====  
SFO1 500.3030896 MHz  
NUC1 1H  
P1 10.00 usec  
PLW1 21.89999962 W

F2 - Processing parameters  
SI 65536  
SF 500.3000000 MHz  
WDW EM  
SSB 0  
LB 0.30 Hz  
GB 0  
PC 1.00



# <sup>1</sup>H-NMR Spectrum of A3

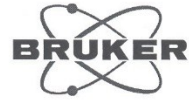

Current Data Parameters  
NAME A3  
EXPNO 1  
PROCNO 1

F2 - Acquisition Parameters  
Date\_ 20171208  
Time 13.22  
INSTRUM AVIII500HD  
PROBHD 5 mm PABBO BB/  
PULPROG zg30  
TD 65536  
SOLVENT DMSO  
NS 150  
DS 2  
SWH 10000.000 Hz  
FIDRES 0.152588 Hz  
AQ 3.2767999 sec  
RG 106.56  
DW 50.000 usec  
DE 13.50 usec  
TE 297.0 K  
D1 1.0000000 sec  
TDO 1

===== CHANNEL f1 =====  
SFO1 500.3030896 MHz  
NUC1 1H  
P1 10.00 usec  
PLW1 21.89999962 W

F2 - Processing parameters  
SI 65536  
SF 500.3000000 MHz  
WDW EM  
SSB 0  
LB 0.30 Hz  
GB 0  
PC 1.00

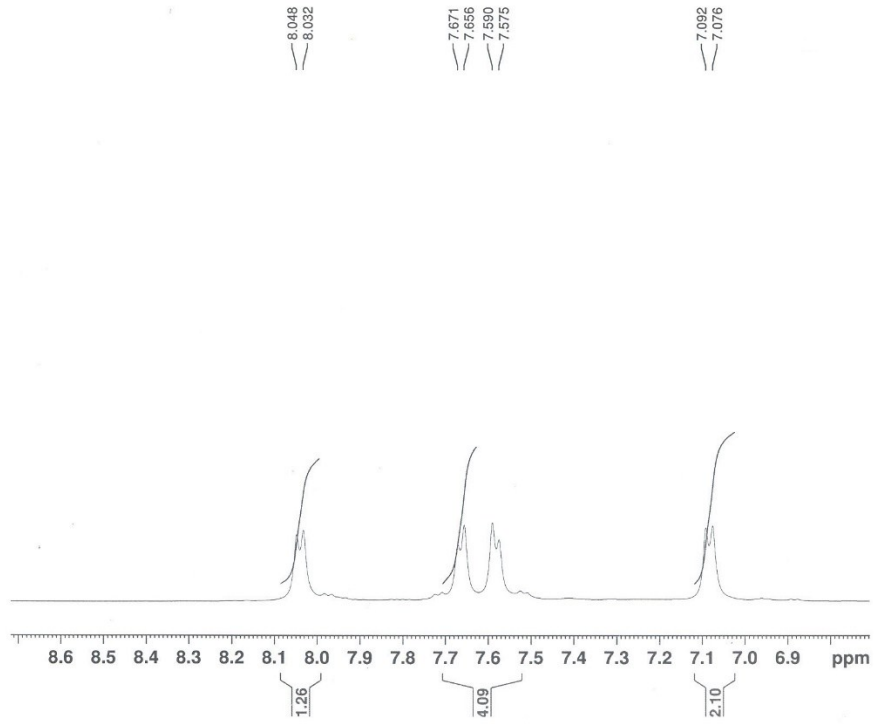

# <sup>13</sup>C-NMR Spectrum of A3

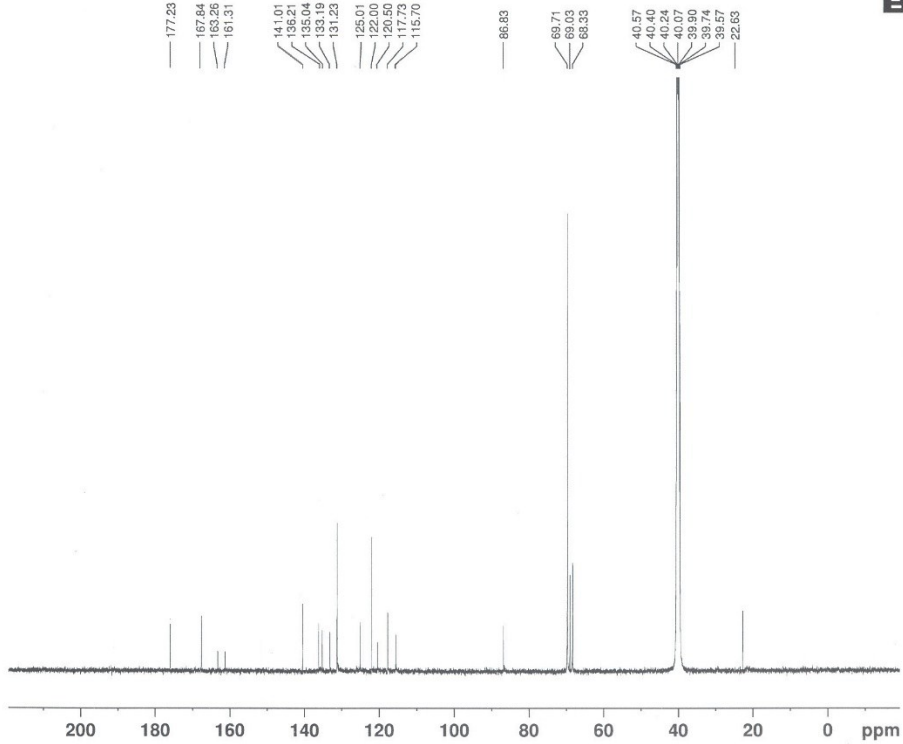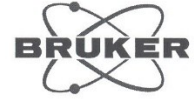

Current Data Parameters  
NAME A3  
EXPNO 1  
PROCNO 1

F2 - Acquisition Parameters  
Date\_ 20140522  
Time 21.13  
INSTRUM AVIII500HD  
PROBHD 5 mm PABBO BB/  
PULPROG zgpg30  
TD 65536  
SOLVENT DMSO  
NS 1700  
DS 4  
SWH 30000.000 Hz  
FIDRES 0.457784 Hz  
AQ 1.0822967 sec  
RG 192.72  
DW 16.567 usec  
DE 7.48 usec  
TE 299.0 K  
D1 2.0000000 sec  
D11 0.0300000 sec  
TD0 1

===== CHANNEL f1 =====  
SFO1 125.8131140 MHz  
NUC1 13C  
P1 10.00 usec  
PLW1 78.0000000 W

===== CHANNEL f2 =====  
SFO2 500.3020012 MHz  
NUC2 1H  
CPDPRG2 waltz16  
PCPD2 80.00 usec  
PLW2 21.0000000 W  
PLW12 0.32813001 W  
PLW13 0.20999999 W

F2 - Processing parameters  
SI 32788  
SF 125.8005351 MHz  
WDW EM  
SSB 0  
LB 1.00 Hz  
GB 0  
PC 1.40

# <sup>1</sup>H-NMR Spectrum of A4

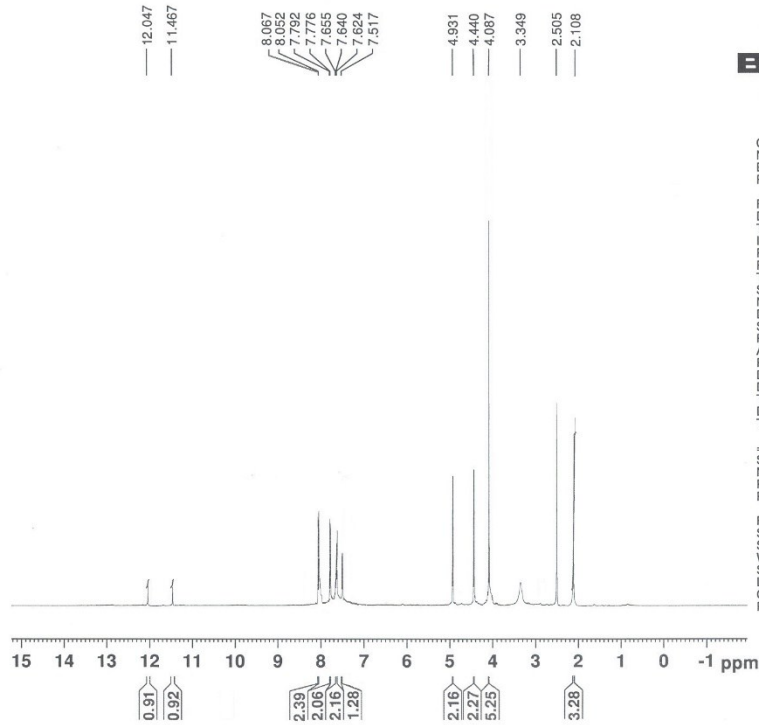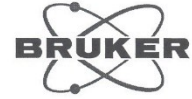

Current Data Parameters  
NAME A4  
EXPNO 1  
PROCNO 1

F2 - Acquisition Parameters  
Date\_ 20171209  
Time 11.42  
INSTRUM AVIII500HD  
PROBHD 5 mm PABBO BB/  
PULPROG zg30  
TD 65536  
SOLVENT DMSO  
NS 16  
DS 2  
SWH 10000.000 Hz  
FIDRES 0.152588 Hz  
AQ 3.2767999 sec  
RG 106.56  
DW 50.000 usec  
DE 13.50 usec  
TE 297.0 K  
D1 1.00000000 sec  
TD0 1

==== CHANNEL f1 =====  
SFO1 500.300896 MHz  
NUC1 1H  
P1 10.00 usec  
PLW1 21.89999962 W  
F2 - Processing parameters  
SI 65536  
SF 500.3000000 MHz  
WDW EM  
SSB 0  
LB 0.30 Hz  
GB 0  
PC 1.00

# <sup>1</sup>H-NMR Spectrum of A4

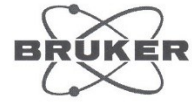

Current Data Parameters  
NAME A4  
EXPNO 1  
PROCNO 1

F2 - Acquisition Parameters  
Date\_ 20171209  
Time 11.42  
INSTRUM AVIII500HD  
PROBHD 5 mm PABBO BB/  
PULPROG zg30  
TD 65536  
SOLVENT DMSO  
NS 16  
DS 2  
SWH 10000.000 Hz  
FIDRES 0.152588 Hz  
AQ 3.2767999 sec  
RG 106.56  
DW 50.000 usec  
DE 13.50 usec  
TE 297.0 K  
D1 1.00000000 sec  
TD0 1

===== CHANNEL f1 =====  
SFO1 500.3030896 MHz  
NUC1 1H  
P1 10.00 usec  
PLW1 21.89999962 W

F2 - Processing parameters  
SI 65536  
SF 500.3000000 MHz  
WDW EM  
SSB 0  
LB 0.30 Hz  
GB 0  
PC 1.00

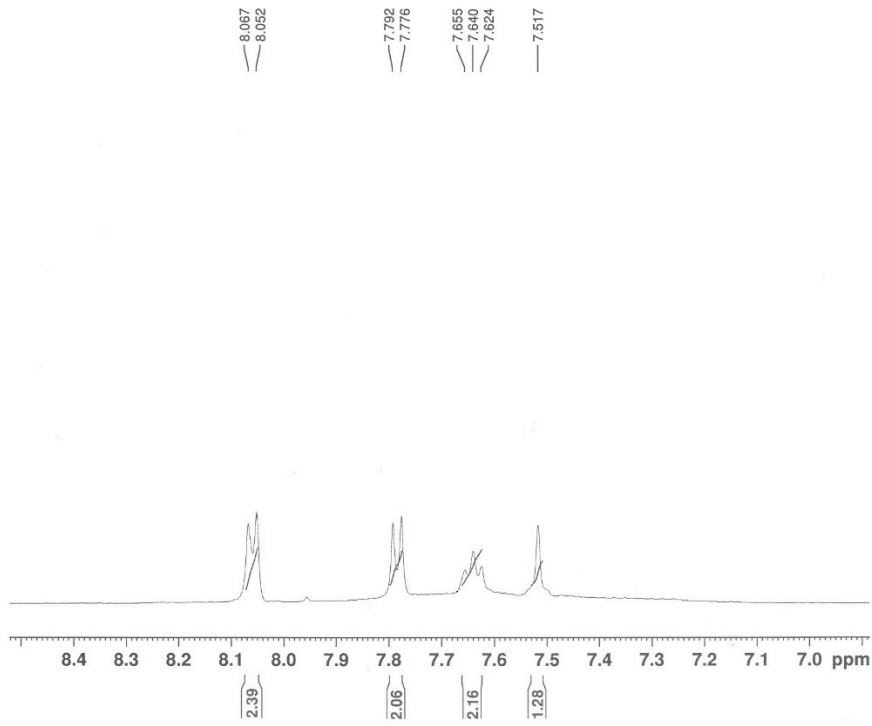

# <sup>13</sup>C-NMR Spectrum of A4

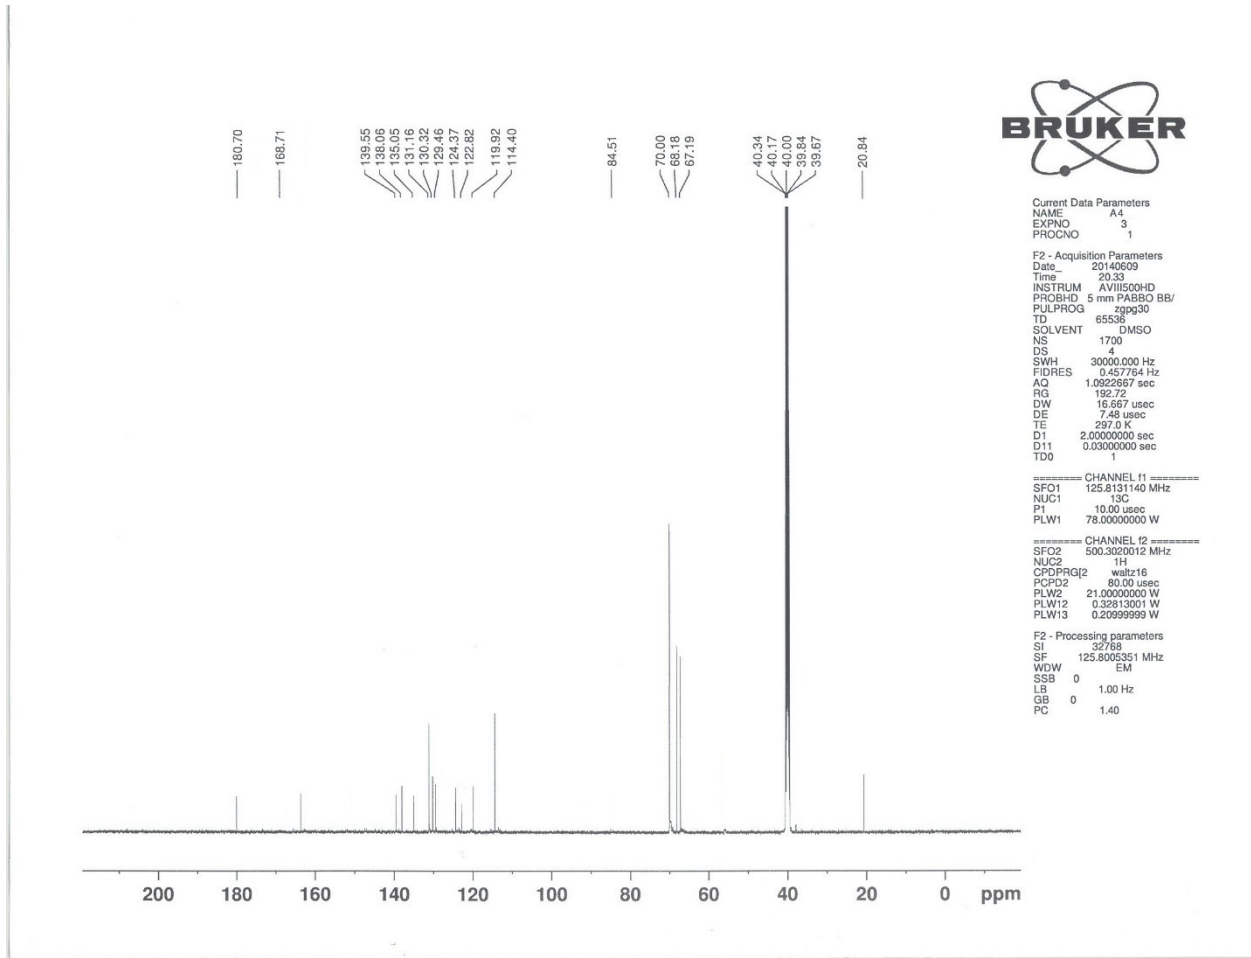

# <sup>1</sup>H-NMR Spectrum of A5

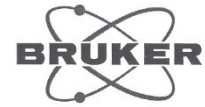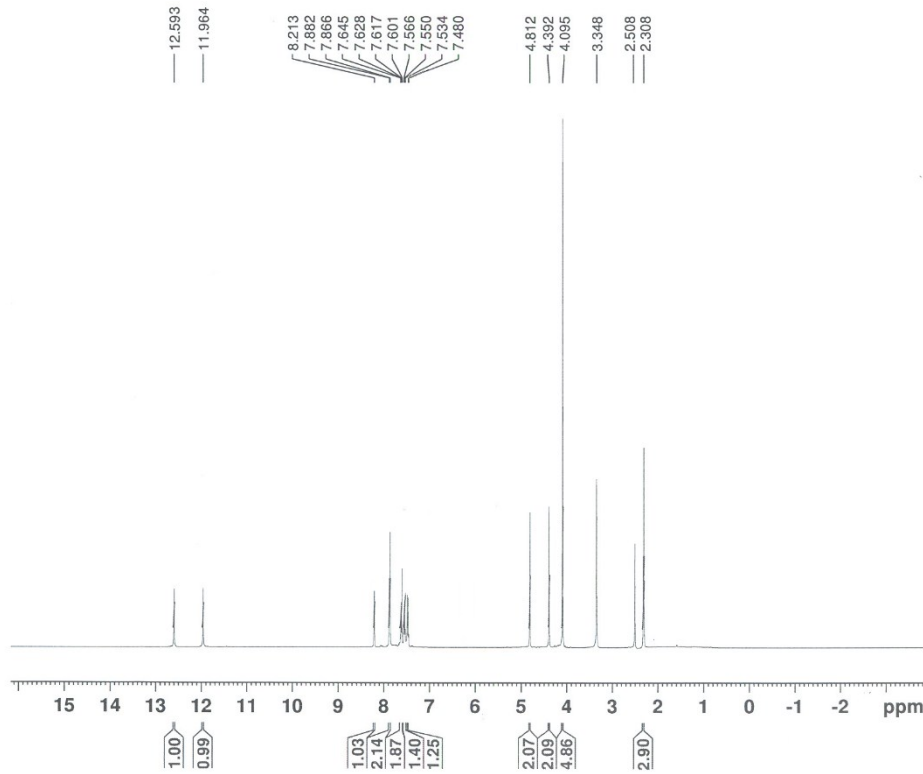

Current Data Parameters  
NAME A5  
EXPNO 2  
PROCNO 1

F2 - Acquisition Parameters  
Date\_ 20171210  
Time 7.31  
INSTRUM AVIII500HD  
PROBHD 5 mm PABBO BB/  
PULPROG zg30  
TD 65536  
SOLVENT DMSO  
NS 48  
DS 2  
SWH 10000.000 Hz  
FIDRES 0.152588 Hz  
AQ 3.2767999 sec  
RG 106.56  
DW 50.000 usec  
DE 13.50 usec  
TE 296.8 K  
D1 1.0000000 sec  
TD0 1

===== CHANNEL f1 =====  
SFO1 500.3030896 MHz  
NUC1 1H  
P1 10.00 usec  
PLW1 21.89999962 W

F2 - Processing parameters  
SI 65536  
SF 500.3000000 MHz  
WDW EM  
SSB 0  
LB 0.30 Hz  
GB 0  
PC 1.00

# <sup>1</sup>H-NMR Spectrum of A5

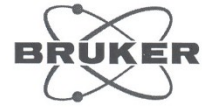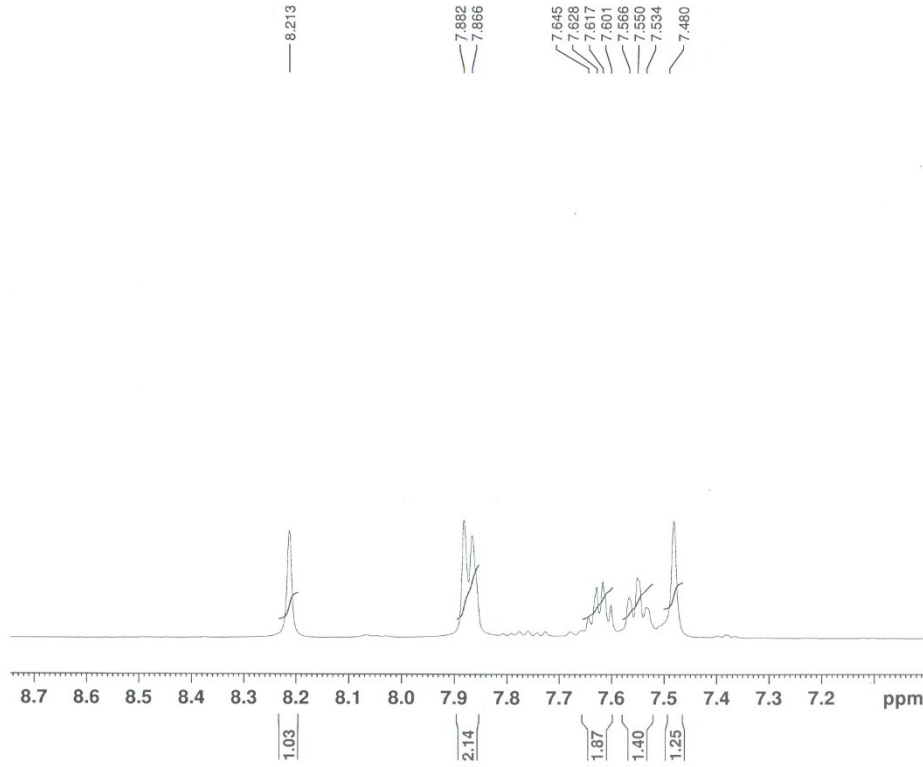

Current Data Parameters  
NAME A5  
EXPNO 2  
PROCNO 1

F2 - Acquisition Parameters  
Date\_ 20171210  
Time 7.31  
INSTRUM AVII500HD  
PROBHD 5 mm PABBO BB/  
PULPROG zg30  
TD 65536  
SOLVENT DMSO  
NS 48  
DS 2  
SWH 10000.000 Hz  
FIDRES 0.152588 Hz  
AQ 3.2767999 sec  
RG 106.56  
DW 50.000 usec  
DE 13.50 usec  
TE 296.8 K  
D1 1.00000000 sec  
TD0 1

===== CHANNEL f1 =====  
SFO1 500.3030896 MHz  
NUC1 1H  
P1 10.00 usec  
PLW1 21.89999962 W

F2 - Processing parameters  
SI 65536  
SF 500.3000000 MHz  
WDW EM  
SSB 0  
LB 0.30 Hz  
GB 0  
PC 1.00

# <sup>13</sup>C-NMR Spectrum of A5

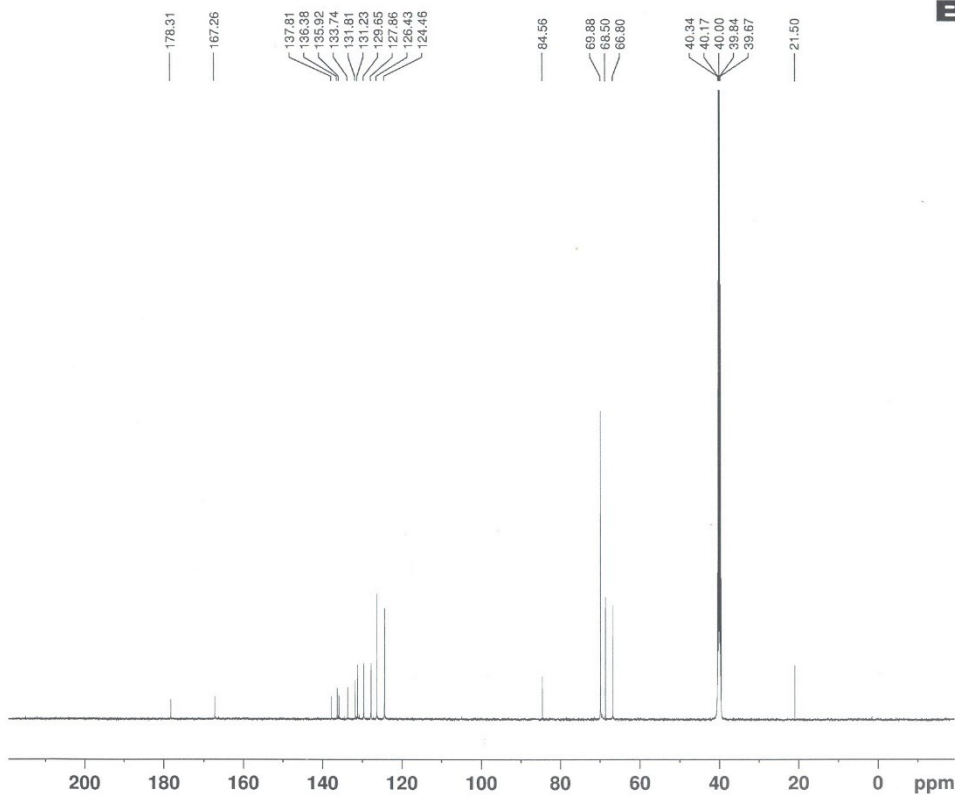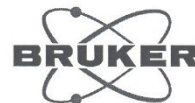

Current Data Parameters  
NAME A5  
EXPNO 3  
PROCNO 1

F2 - Acquisition Parameters  
Date\_ 20140723  
Time 22.58  
INSTRUM AVIUS500HD  
PROBHD 5 mm PABBO BB/  
PULPROG zgpg30  
TD 65536  
SOLVENT DMSO  
NS 1700  
DS 4  
SWH 30000.000 Hz  
FIDRES 0.457764 Hz  
AQ 1.032667 sec  
RG 192.72  
DW 16.667 usec  
DE 7.48 usec  
TE 298.0 K  
D1 2.0000000 sec  
D11 0.0000000 sec  
TDO 1

===== CHANNEL f1 =====  
SFO1 125.8131140 MHz  
NUC1 <sup>13</sup>C  
P1 10.00 usec  
PLW1 78.0000000 W

===== CHANNEL f2 =====  
SFO2 500.3020012 MHz  
NUC2 <sup>1</sup>H  
CPDPRG2 waltz16  
PCPD2 80.00 usec  
PLW2 21.0000000 W  
PLW12 0.32813001 W  
PLW13 0.20999999 W

F2 - Processing parameters  
SI 32768  
SF 125.806351 MHz  
WDW EM  
SSB 0  
LB 1.00 Hz  
GB 0  
PC 1.40



# <sup>1</sup>H-NMR Spectrum of A6

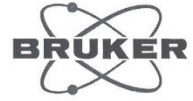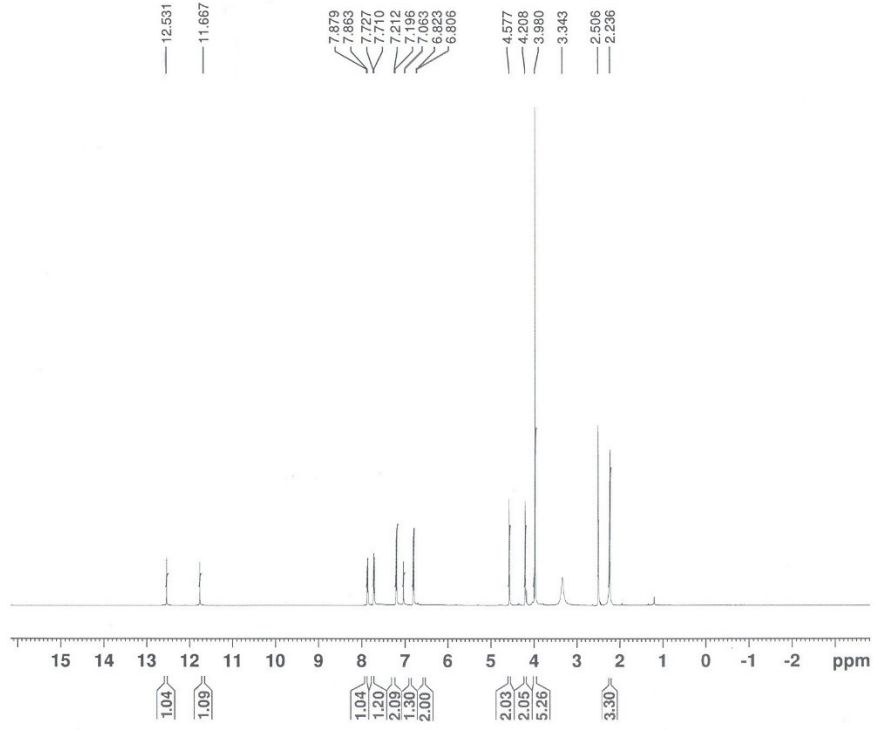

Current Data Parameters  
NAME A6  
EXPNO 3  
PROCNO 1

F2 - Acquisition Parameters  
Date\_ 20171208  
Time 20.35  
INSTRUM AVIISO0HD  
PROBHD 5 mm PABBO BB/  
PULPROG zg30  
TD 65536  
SOLVENT DMSO  
NS 120  
DS 2  
SWH 10000.000 Hz  
FIDRES 0.152588 Hz  
AQ 3.2787999 sec  
RG 106.56  
DW 50.000 usec  
DE 13.50 usec  
TE 297.0 K  
D1 1.0000000 sec  
TD0 1

----- CHANNEL f1 -----  
SFO1 500.3030896 MHz  
NUC1 1H  
P1 10.00 usec  
PLW1 21.89999962 W

F2 - Processing parameters  
SI 65536  
SF 500.3000000 MHz  
WDW EM  
SSB 0  
LB 0.30 Hz  
GB 0  
PC 1.00

# <sup>1</sup>H-NMR Spectrum of A6

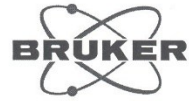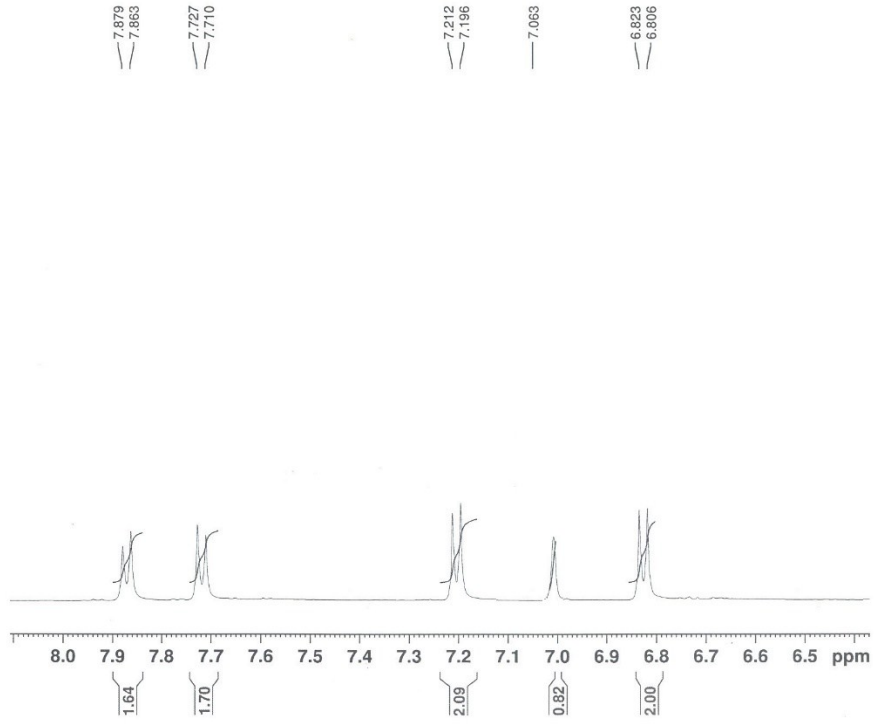

Current Data Parameters  
NAME A6  
EXPNO 3  
PROCNO 1

F2 - Acquisition Parameters  
Date\_ 20171208  
Time 20.35  
INSTRUM AVIII500HD  
PROBHD 5 mm PABBO BB/  
PULPROG zg30  
TD 65536  
SOLVENT DMSO  
NS 120  
DS 2  
SWH 10000.000 Hz  
FIDRES 0.152588 Hz  
AQ 3.2767999 sec  
RG 106.56  
DW 50.000 usec  
DE 13.50 usec  
TE 297.0 K  
D1 1.00000000 sec  
TD0 1

===== CHANNEL f1 =====  
SFO1 500.3030896 MHz  
NUC1 1H  
P1 10.00 usec  
PLW1 21.89999962 W

F2 - Processing parameters  
SI 65536  
SF 500.3000000 MHz  
WDW EM  
SSB 0  
LB 0.30 Hz  
GB 0  
PC 1.00

# <sup>13</sup>C-NMR Spectrum of A6

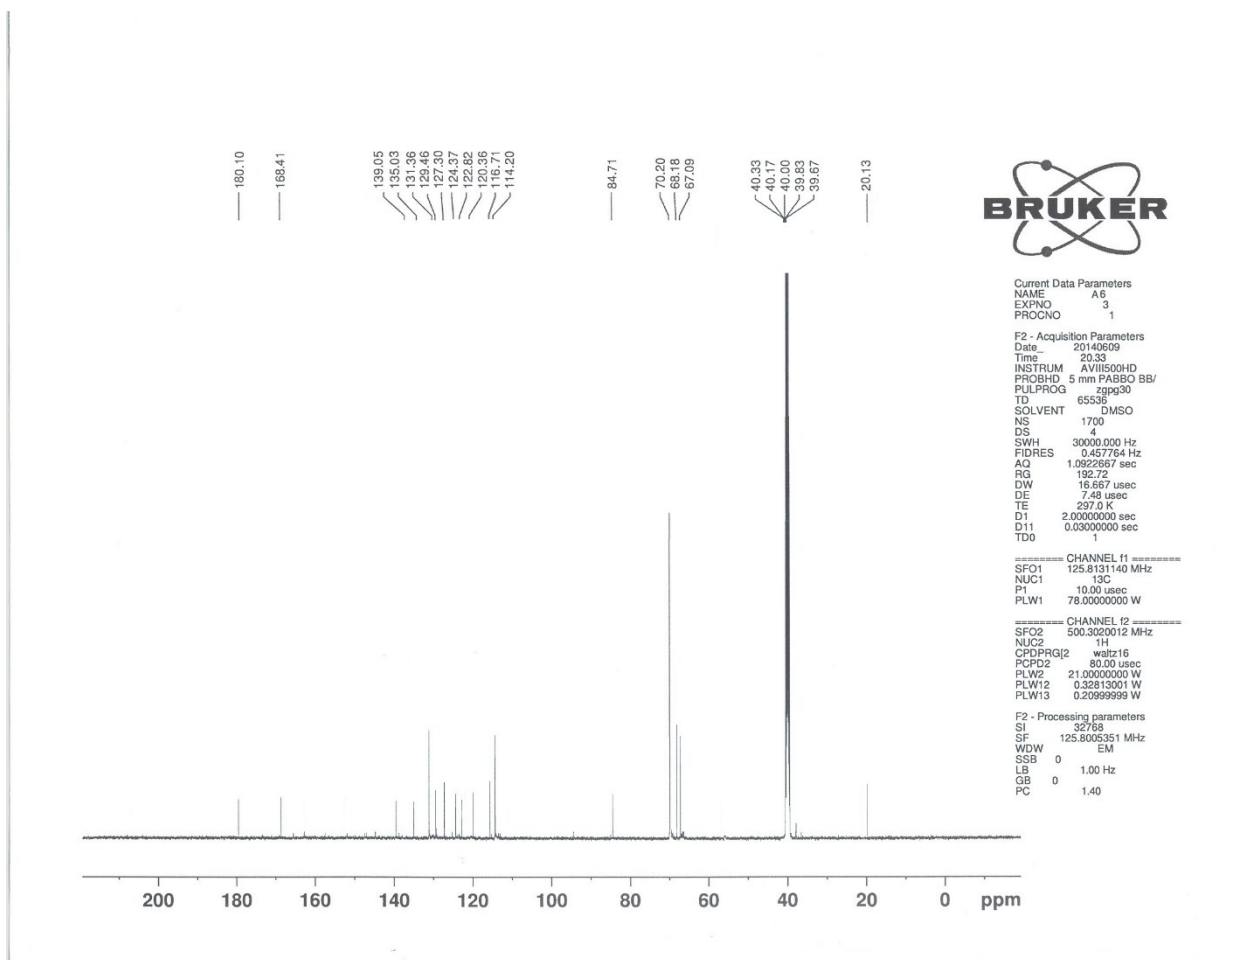

# <sup>1</sup>H-NMR Spectrum of A7

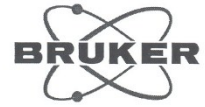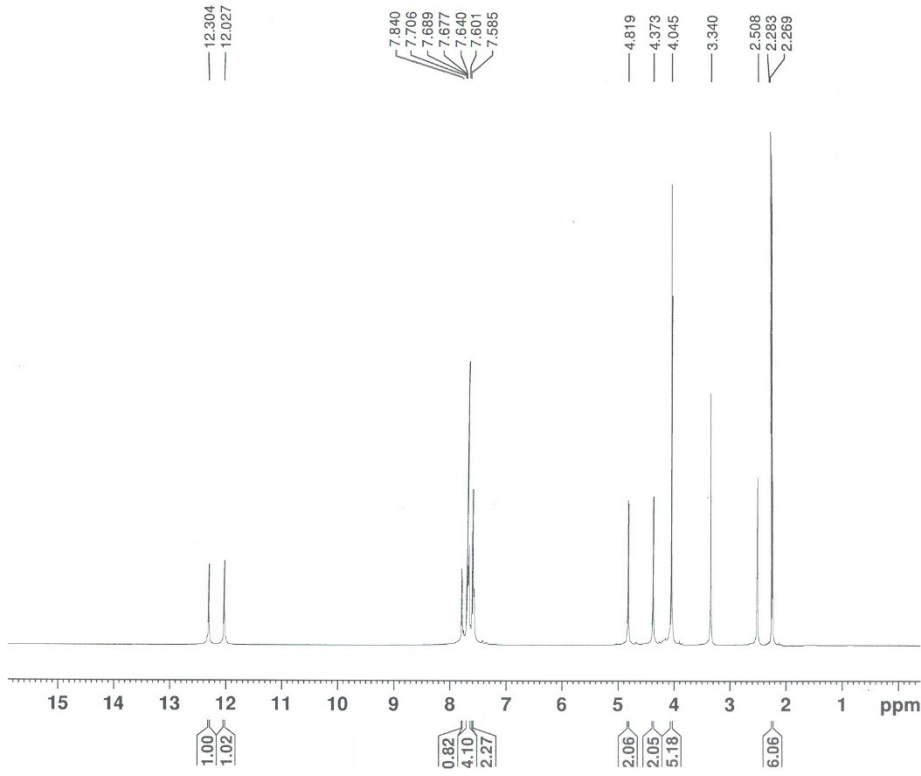

Current Data Parameters  
NAME A7  
EXPNO 2  
PROCNO 1

F2 - Acquisition Parameters  
Date\_ 20171211  
Time 16.53  
INSTRUM AVIII500HD  
PROBHD 5 mm PABBO BB/  
PULPROG zg30  
TD 65536  
SOLVENT DMSO  
NS 120  
DS 2  
SWH 10000.000 Hz  
FIDRES 0.152588 Hz  
AQ 3.2767999 sec  
RG 106.56  
DW 50.000 usec  
DE 13.50 usec  
TE 297.0 K  
D1 1.0000000 sec  
TD0 1

===== CHANNEL f1 =====  
SFO1 500.3030896 MHz  
NUC1 <sup>1</sup>H  
P1 10.00 usec  
PLW1 21.89999962 W

F2 - Processing parameters  
SI 65536  
SF 500.3000000 MHz  
WDW EM  
SSB 0  
LB 0.30 Hz  
GB 0  
PC 1.00

# <sup>1</sup>H-NMR Spectrum of A7

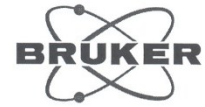

Current Data Parameters  
NAME A7  
EXPNO 2  
PROCNO 1

F2 - Acquisition Parameters  
Date\_ 20171211  
Time 16.53  
INSTRUM AVII500HD  
PROBHD 5 mm PABBO BB/  
PULPROG zg30  
TD 65536  
SOLVENT DMSO  
NS 120  
DS 2  
SWH 10000.000 Hz  
FIDRES 0.152588 Hz  
AQ 3.2767999 sec  
RG 106.56  
DW 50.000 usec  
DE 13.50 usec  
TE 297.0 K  
D1 1.00000000 sec  
TD0 1

===== CHANNEL f1 =====  
SFO1 500.3030896 MHz  
NUC1 1H  
P1 10.00 usec  
PLW1 21.89999962 W

F2 - Processing parameters  
SI 65536  
SF 500.3000000 MHz  
WDW EM  
SSB 0  
LB 0.30 Hz  
GB 0  
PC 1.00

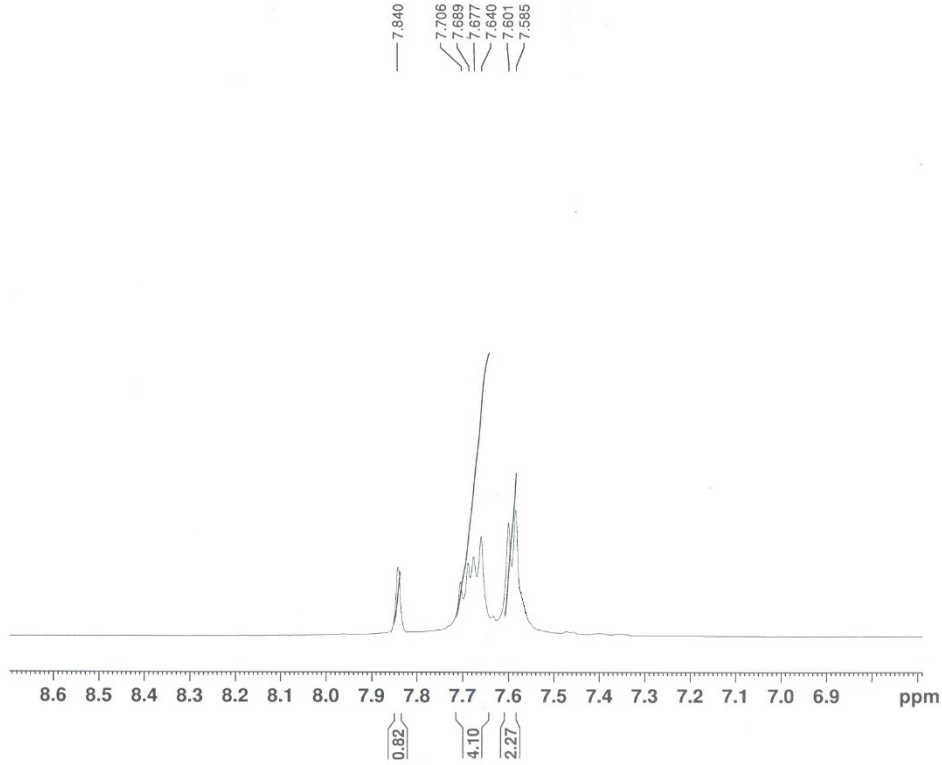

# <sup>13</sup>C-NMR Spectrum of A7

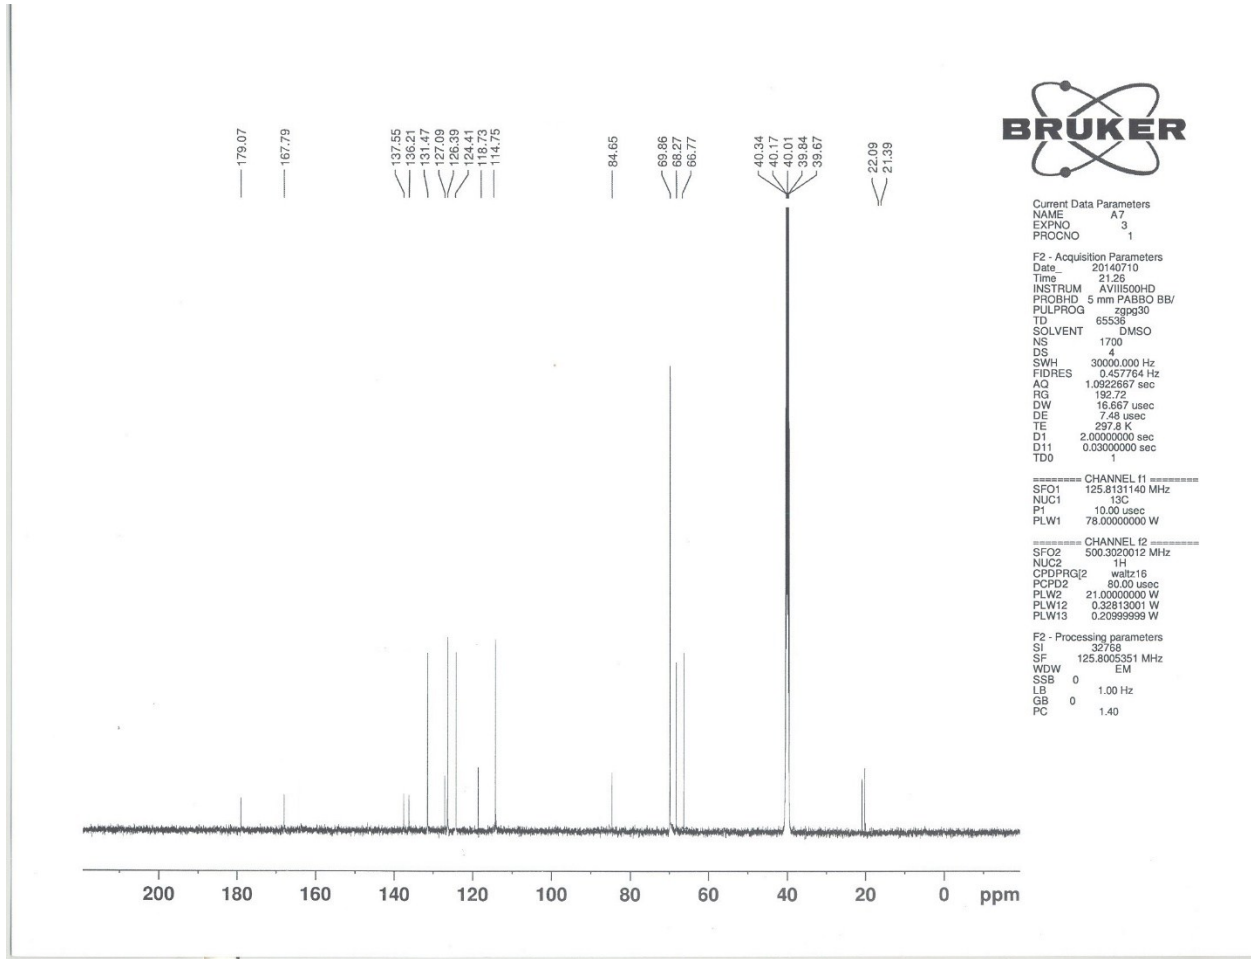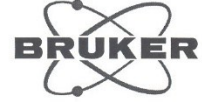

Current Data Parameters  
NAME A7  
EXPNO 3  
PROCNO 1

F2 - Acquisition Parameters  
Date\_ 20140710  
Time 21.26  
INSTRUM AVIIIS00HD  
PROBHD 5 mm PABBO BB/  
PULPROG zgpg30  
TD 65536  
SOLVENT DMSO  
NS 1700  
DS 4  
SWH 30000.000 Hz  
FIDRES 0.457764 Hz  
AQ 1.0922667 sec  
RG 192.72  
DW 16.667 usec  
DE 7.48 usec  
TE 297.2 K  
D1 2.0000000 sec  
D11 0.0300000 sec  
TD0 1

===== CHANNEL 1 =====  
SFO1 125.8131140 MHz  
NUC1 13C  
P1 10.00 usec  
PLW1 78.0000000 W

===== CHANNEL 2 =====  
SFO2 500.3020012 MHz  
NUC2 1H  
CPDPRG2 waltz16  
PCPD2 80.00 usec  
PLW2 21.0000000 W  
PLW12 0.32813001 W  
PLW13 0.20266669 W

F2 - Processing parameters  
SI 32768  
SF 125.8005351 MHz  
WDW EM  
SSB 0  
LB 1.00 Hz  
GB 0  
PC 1.40

# <sup>1</sup>H-NMR Spectrum of A8

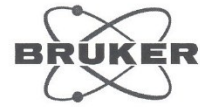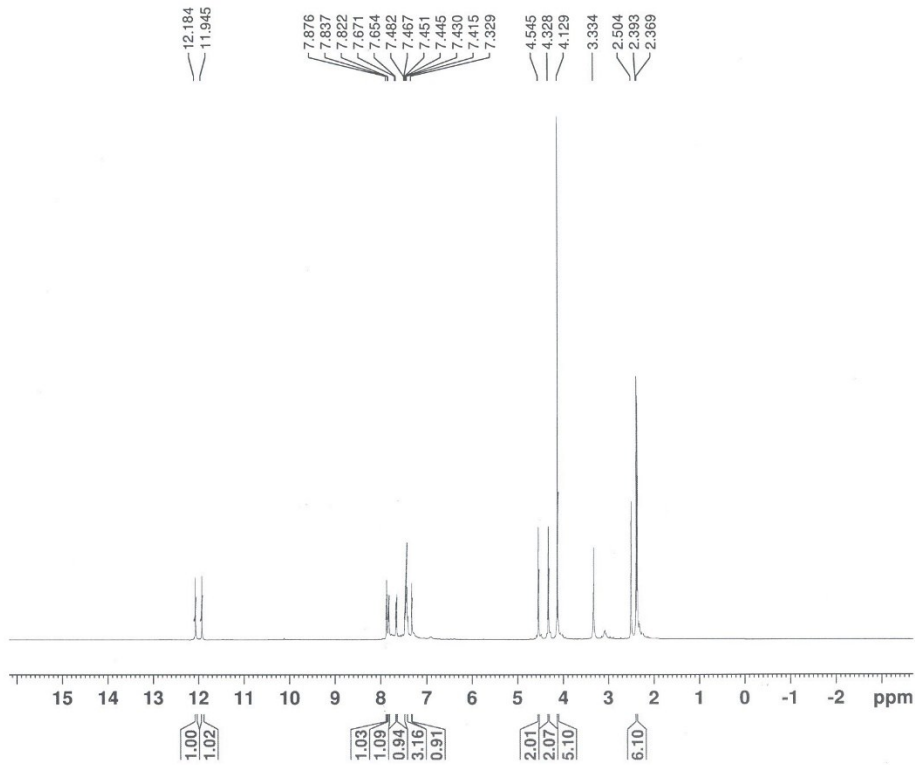

Current Data Parameters  
NAME A8  
EXPNO 1  
PROCNO 1

F2 - Acquisition Parameters  
Date\_ 20171209  
Time 13.46  
INSTRUM AVII500HD  
PROBHD 5 mm PABBO BB/  
PULPROG zg30  
TD 65536  
SOLVENT DMSO  
NS 32  
DS 2  
SWH 10000.000 Hz  
FIDRES 0.152588 Hz  
AQ 3.2767999 sec  
RG 106.56  
DW 50.000 usec  
DE 13.50 usec  
TE 299.0 K  
D1 1.00000000 sec  
TD0 1

----- CHANNEL f1 -----  
SFO1 500.3030896 MHz  
NUC1 1H  
P1 10.00 usec  
PLW1 21.89999962 W

F2 - Processing parameters  
SI 65536  
SF 500.3000000 MHz  
WDW EM  
SSB 0  
LB 0.30 Hz  
GB 0  
PC 1.00

# <sup>1</sup>H-NMR Spectrum of A8

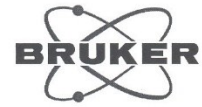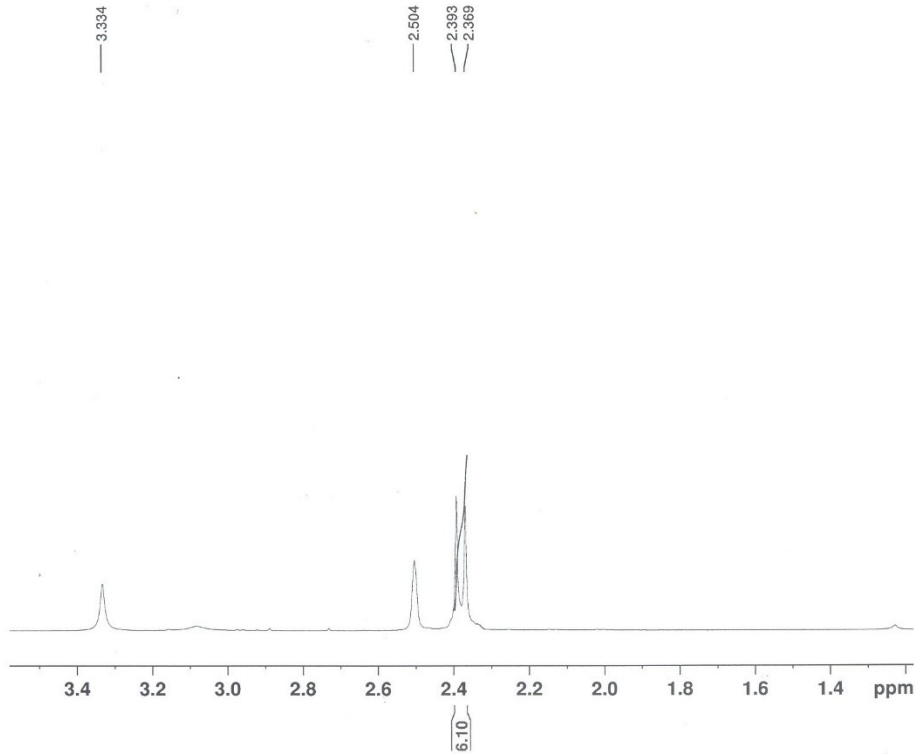

Current Data Parameters  
NAME A8  
EXPNO 1  
PROCNO 1

F2 - Acquisition Parameters  
Date\_ 20171209  
Time 13.46  
INSTRUM AVII500HD  
PROBHD 5 mm PABBO BB/  
PULPROG zg30  
TD 65536  
SOLVENT DMSO  
NS 32  
DS 2  
SWH 10000.000 Hz  
FIDRES 0.152588 Hz  
AQ 3.2767999 sec  
RG 106.56  
DW 50.000 usec  
DE 13.50 usec  
TE 299.0 K  
D1 1.00000000 sec  
TD0 1

----- CHANNEL f1 -----  
SFO1 500.3030896 MHz  
NUC1 1H  
P1 10.00 usec  
PLW1 21.89999962 W

F2 - Processing parameters  
SI 65536  
SF 500.3000000 MHz  
WDW EM  
SSB 0  
LB 0 0.30 Hz  
GB 0  
PC 1.00



# <sup>1</sup>H-NMR Spectrum of A8

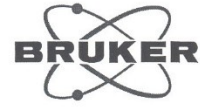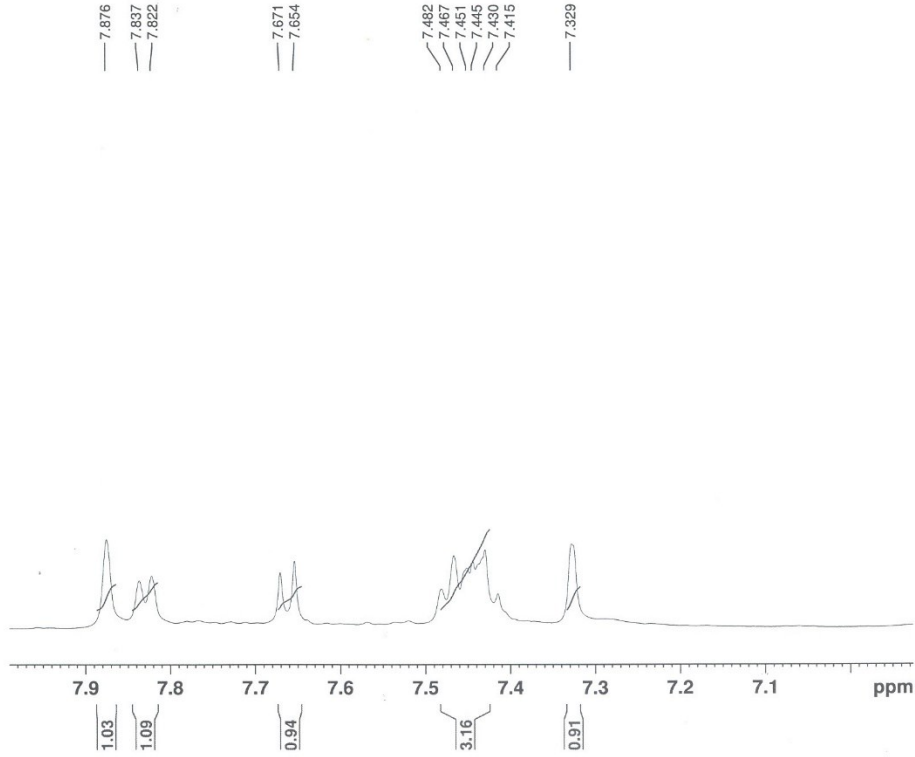

Current Data Parameters  
NAME A8  
EXPNO 1  
PROCNO 1

F2 - Acquisition Parameters  
Date\_ 20171209  
Time 13.46  
INSTRUM AVIII500HD  
PROBHD 5 mm PABBO BB/  
PULPROG zg30  
TD 65536  
SOLVENT DMSO  
NS 32  
DS 2  
SWH 10000.000 Hz  
FIDRES 0.152588 Hz  
AQ 3.2767999 sec  
RG 106.56  
DW 50.000 usec  
DE 13.50 usec  
TE 299.0 K  
D1 1.00000000 sec  
TDO 1

----- CHANNEL f1 -----  
SFO1 500.3030896 MHz  
NUC1 1H  
P1 10.00 usec  
PLW1 21.89999962 W

F2 - Processing parameters  
SI 65536  
SF 500.3000000 MHz  
WDW EM  
SSB 0  
LB 0.30 Hz  
GB 0  
PC 1.00

# <sup>13</sup>C-NMR Spectrum of A8

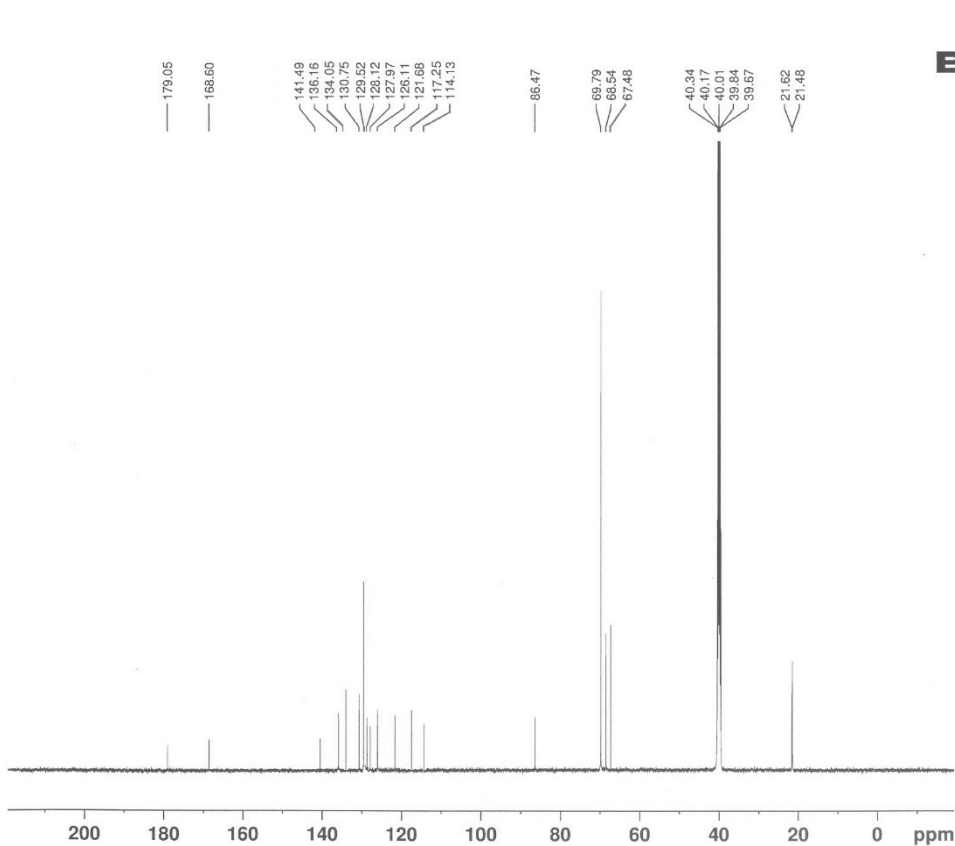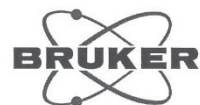

Current Data Parameters  
NAME A8  
EXPNO 3  
PROCNO 1

F2 - Acquisition Parameters  
Date\_ 20140711  
Time 19.33  
INSTRUM AVII500HD  
PROBHD 5 mm PABBO BB/  
PULPROG zgpg30  
TD 65538  
SOLVENT DMSO  
NS 1700  
DS 4  
SWH 30000.000 Hz  
FIDRES 0.457764 Hz  
AQ 1.0922667 sec  
RG 192.72  
DW 16.967 usec  
DE 7.48 usec  
TE 297.5 K  
D1 2.0000000 sec  
D11 0.0300000 sec  
TDO 1

===== CHANNEL f1 =====  
SFO1 125.8131140 MHz  
NUC1 <sup>13</sup>C  
P1 10.00 usec  
PLW1 78.0000000 W

===== CHANNEL f2 =====  
SFO2 500.3020012 MHz  
NUC2 <sup>1</sup>H  
CPDPRG2 waltz16  
PCPD2 80.00 usec  
PLW2 21.0000000 W  
PLW12 0.32813001 W  
PLW13 0.20999999 W

F2 - Processing parameters  
SI 32768  
SF 125.806351 MHz  
WDW EM  
SSB 0  
LB 1.00 Hz  
GB 0  
PC 1.40

# <sup>1</sup>H-NMR Spectrum of A9

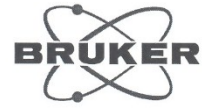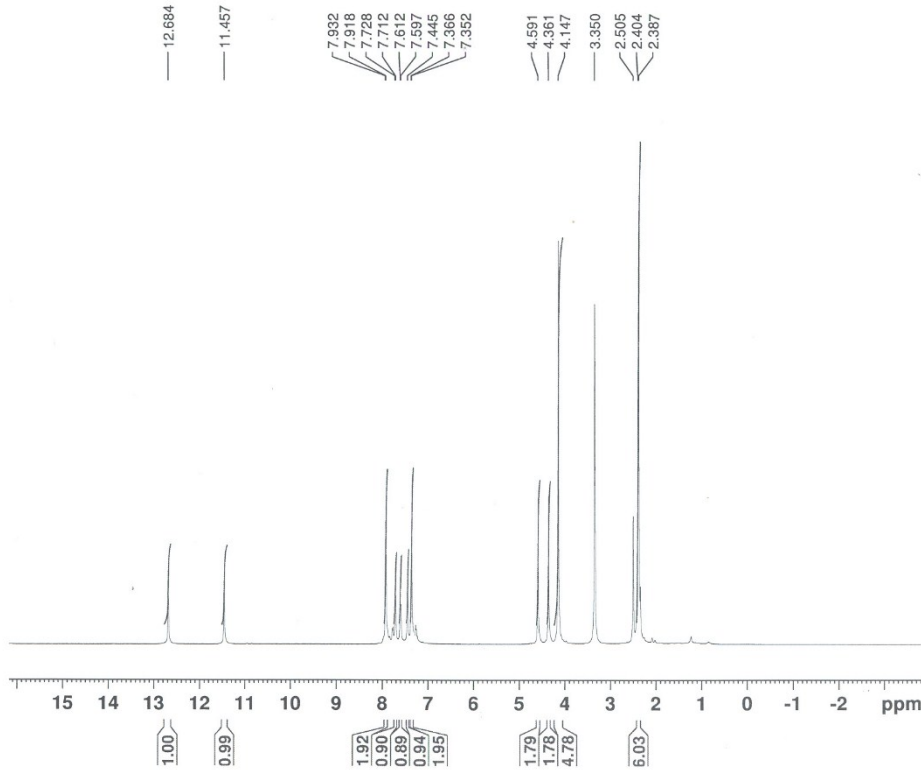

Current Data Parameters  
NAME A9  
EXPNO 2  
PROCNO 1

F2 - Acquisition Parameters  
Date\_ 20171211  
Time 17.37  
INSTRUM AVIII500HD  
PROBHD 5 mm PABBO BB/  
PULPROG zg30  
TD 65536  
SOLVENT DMSO  
NS 64  
DS 2  
SWH 10000.000 Hz  
FIDRES 0.152588 Hz  
AQ 3.2767999 sec  
RG 106.56  
DW 50.000 usec  
DE 13.50 usec  
TE 296.7 K  
D1 1.00000000 sec  
TD0 1

===== CHANNEL f1 =====  
SFO1 500.3030896 MHz  
NUC1 <sup>1</sup>H  
P1 10.00 usec  
PLW1 21.89999962 W

F2 - Processing parameters  
SI 85536  
SF 500.3000000 MHz  
WDW EM  
SSB 0  
LB 0.30 Hz  
GB 0  
PC 1.00

# <sup>1</sup>H-NMR Spectrum of A9

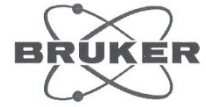

7.932  
7.918  
7.728  
7.712  
7.612  
7.597  
7.445  
7.366  
7.352

Current Data Parameters  
NAME A9  
EXPNO 2  
PROCNO 1

F2 - Acquisition Parameters  
Date\_ 20171211  
Time 17:37  
INSTRUM AVIII500HD  
PROBHD 5 mm PABBO BB/  
PULPROG zg30  
TD 65536  
SOLVENT DMSO  
NS 64  
DS 2  
SWH 10000.000 Hz  
FIDRES 0.152588 Hz  
AQ 3.2767999 sec  
RG 106.56  
DW 50.000 usec  
DE 13.50 usec  
TE 296.7 K  
D1 1.00000000 sec  
TD0 1

===== CHANNEL f1 =====  
SFO1 500.300896 MHz  
NUC1 1H  
P1 10.00 usec  
PLW1 21.89999962 W

F2 - Processing parameters  
SI 65536  
SF 500.300000 MHz  
WDW EM  
SSB 0  
LB 0.30 Hz  
GB 0  
PC 1.00

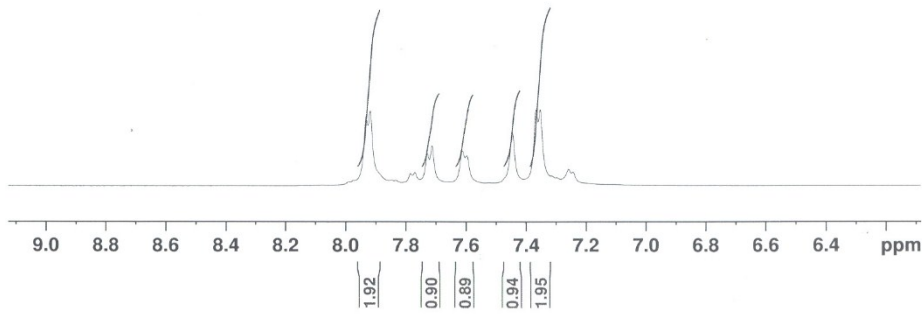

# <sup>13</sup>C-NMR Spectrum of A9

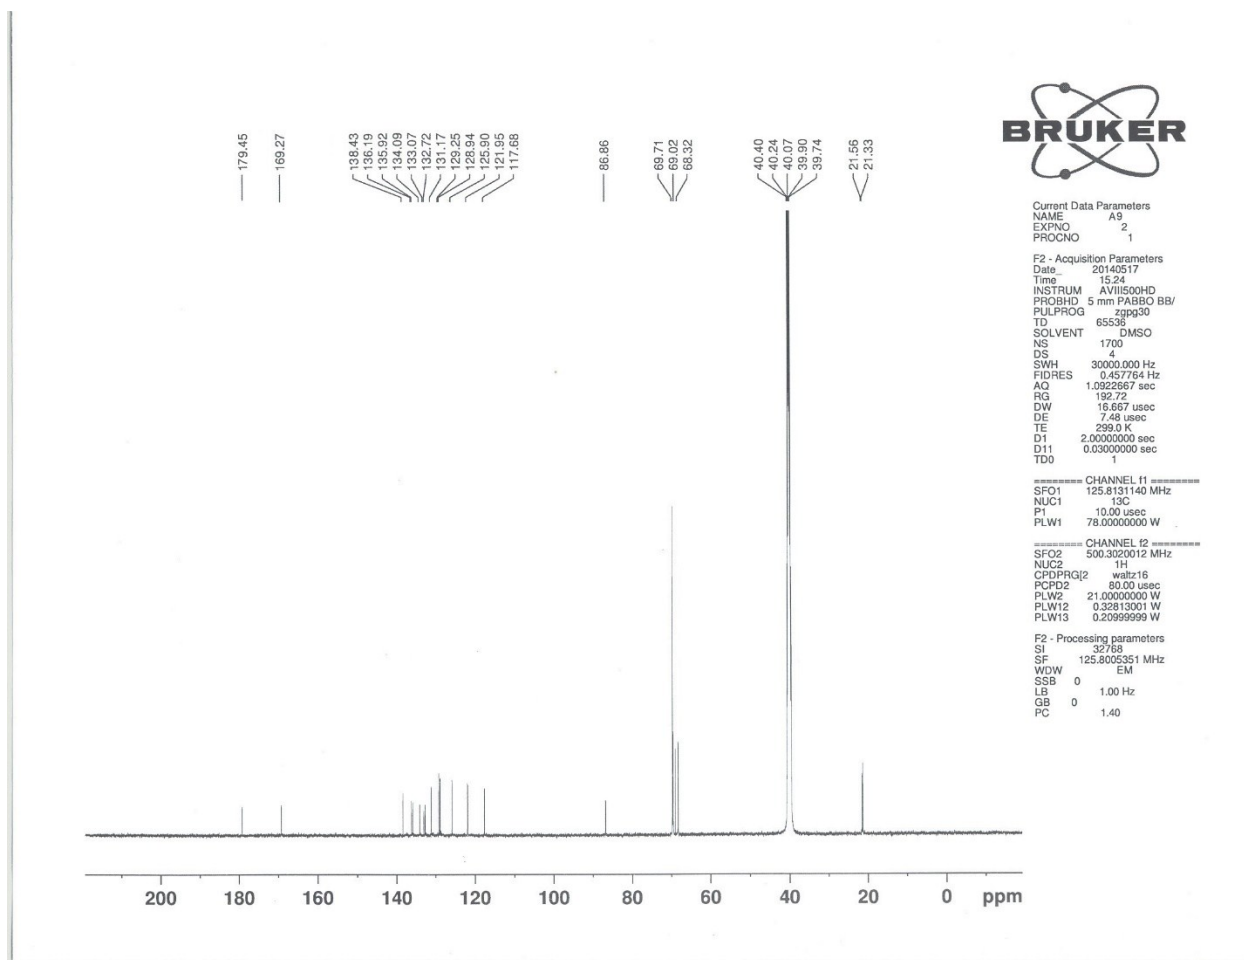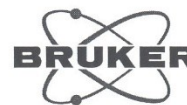

Current Data Parameters  
NAME A9  
EXPNO 2  
PROCNO 1

F2 - Acquisition Parameters  
Date 20140517  
Time 15:24  
INSTRUM AVIIIS00HD  
PROBHD 5 mm PABBO BB/  
PULPROG zgpg30  
TD 65536  
SOLVENT DMSO  
NS 1700  
DS 4  
SWH 30000.000 Hz  
FIDRES 0.457764 Hz  
AQ 1.0922667 sec  
RG 192.72  
DW 16.667 usec  
DE 7.48 usec  
TE 299.0 K  
D1 2.0000000 sec  
D11 0.0300000 sec  
TD0 1

===== CHANNEL f1 =====  
SFO1 125.8131140 MHz  
NUC1 13C  
P1 10.00 usec  
PLW1 78.0000000 W

===== CHANNEL f2 =====  
SFO2 500.3020012 MHz  
NUC2 1H  
CPDPRG2 waltz16  
PCPD2 80.00 usec  
PLW2 21.0000000 W  
PLW12 0.32813001 W  
PLW13 0.20999999 W

F2 - Processing parameters  
SI 32788  
SF 125.8005351 MHz  
WDW EM  
SSB 0  
LB 1.00 Hz  
GB 0  
PC 1.40
